# Supplementary material for: Fast automated detection of COVID-19 from medical images using convolutional neural networks
Source: Springer Nature journal article supplement (doi:10.1038/s42003-020-01535-7), 2021-01-04
Supplement: MOESM2 [file 42003_2020_1535_MOESM2_ESM.pdf]

1 Fast automated detection of COVID-19 from medical images using  
2 convolutional neural networks

3 **Shuang Liang**<sup>1</sup>, **Huixiang Liu**<sup>1</sup>, **Yu Gu**<sup>2,3,4,\*</sup>, **Xiuhua Guo**<sup>5,6</sup>, **Hongjun Li**<sup>7</sup>, **Li Li**<sup>7</sup>,  
4 **Zhiyuan Wu**<sup>5,6</sup>, **Mengyang Liu**<sup>5,6</sup>, and **Lixin Tao**<sup>5,6</sup>

5 <sup>1</sup>School of Automation and Electrical Engineering, University of Science and Technology  
6 Beijing, Beijing 100083, China.

7 <sup>2</sup>Beijing Advanced Innovation Center for Soft Matter Science and Engineering, Beijing  
8 University of Chemical Technology, Beijing 100029, China.

9 <sup>3</sup>School of AutoMation, Guangdong University of Petrochemical Technology, Maoming  
10 525000, Guangdong, China.

11 <sup>4</sup>Department of Chemistry, Institute of Inorganic and Analytical Chemistry,  
12 Goethe-University, 60438 Frankfurt, Germany.

13 <sup>5</sup>Department of Epidemiology and Health Statistics, School of Public Health, Capital  
14 Medical University, Beijing, China.

15 <sup>6</sup>Beijing Municipal Key Laboratory of Clinical Epidemiology, Capital Medical University,  
16 Beijing, China.

17 <sup>7</sup>Beijing Youan Hospital, Capital Medical University, Beijing, China.

18 \*Corresponding author: Yu Gu:guyu@mail.buct.edu.cn

## Supplementary information

### Supplementary Note 1: Explanation of the expert groups

In China, medical education starts after high school and ranges from three to six years at the undergraduate level, followed by 3 years at the graduate level[1]. The 3-year postgraduate medical education is called standardized residency training (SRT) and is aimed at equipping medical graduates with practical clinical skills to enable them to become application-oriented, multi-skilled professionals serving in the national health system[2]. After passing the SRT, resident physicians can become a specialists. Students majoring in medical imaging discipline can enter the department of radiology as residents after 5-7 years of study at a college[3]. In our manuscript, the expert group is consisted of five members including a 7th-year respiratory resident, a 3rd-year emergency resident, a 1st-year respiratory intern, a 5th-year radiologist and a 3rd-year radiologist. Here, the 7th-year respiratory resident is a doctor that has passed the SRT and has 7 years of experience in the clinical work of respiratory diseases. The 3rd-year emergency resident is a doctor that has passed the SRT and has 3 years of experience in an emergency department. The 1st-year respiratory intern is a doctor that has passed the SRT and has started clinical work in respiratory diseases. The 5th-year radiologist has 5 years of experience in the department of radiology and the 3rd-year radiologist has 3 years of experience in the department of radiology.

### Supplementary Note 2: Equations of the five metrics

The Kappa score (Kappa), sensitivity (Sen), specificity (Spe), precision (Pr), and F1-score metrics derived from the confusion matrix were used to determine the performance of the CNNCF. The equations are as follows:

$$pe = ((TN + FN) * (TN + FP) + (TP + FP) * (TP + FN)) / (N * N) \quad (1)$$

$$p0 = (TP + TN) / N \quad (2)$$

$$Kappa = (p0 - pe) / (1 - pe) \quad (3)$$

$$Sen = TP / (TP + FN) \quad (4)$$

$$Spe = TN / (TN + FP) \quad (5)$$

$$Pr = (TP) / (TP + FP) \quad (6)$$

$$F1 - Score = 2 * Pr * Sen / (Pr + Sen) \quad (7)$$

where True positive (TP) represents the number of COVID-19 lung images correctly classified as COVID-19 cases and TN represents the number of \*Normal lung images correctly classified as the \*Normal lung cases. FP represents the number of \*Normal lung images incorrectly classified as COVID-19 cases and FN represents the number of COVID-19 lung images misclassified as \*Normal lung cases. N represents the number of cases in the test dataset.

50 **Supplementary Figures**

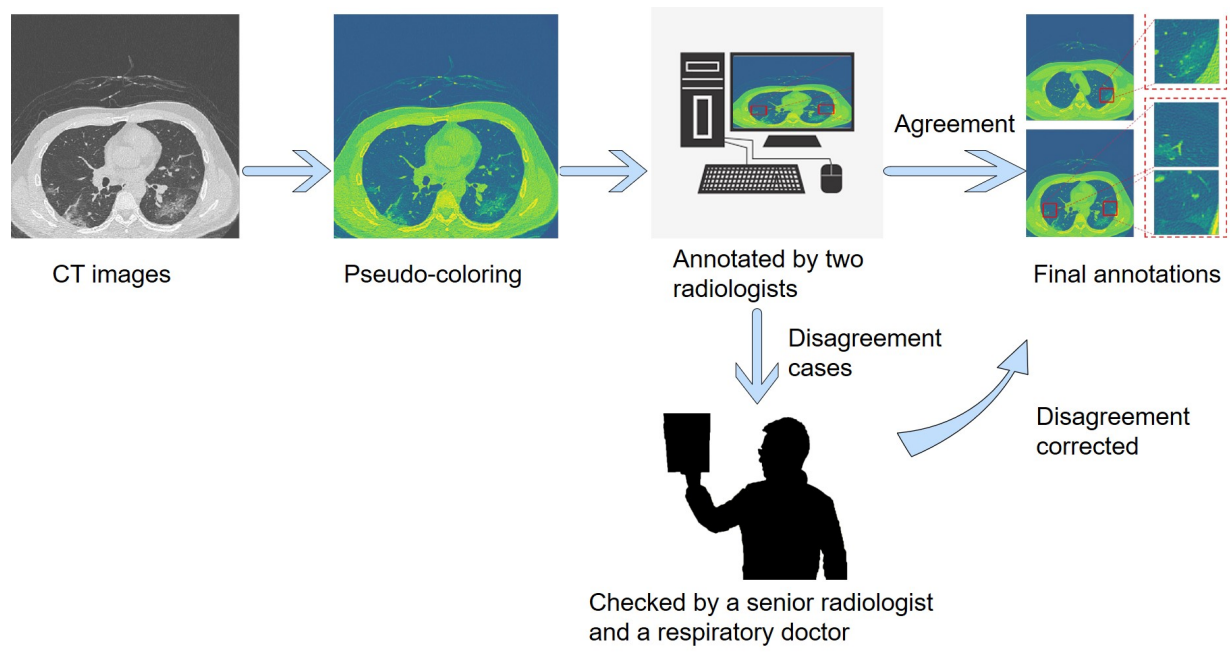

Supplementary Figure 1: The overall pipeline of the annotation

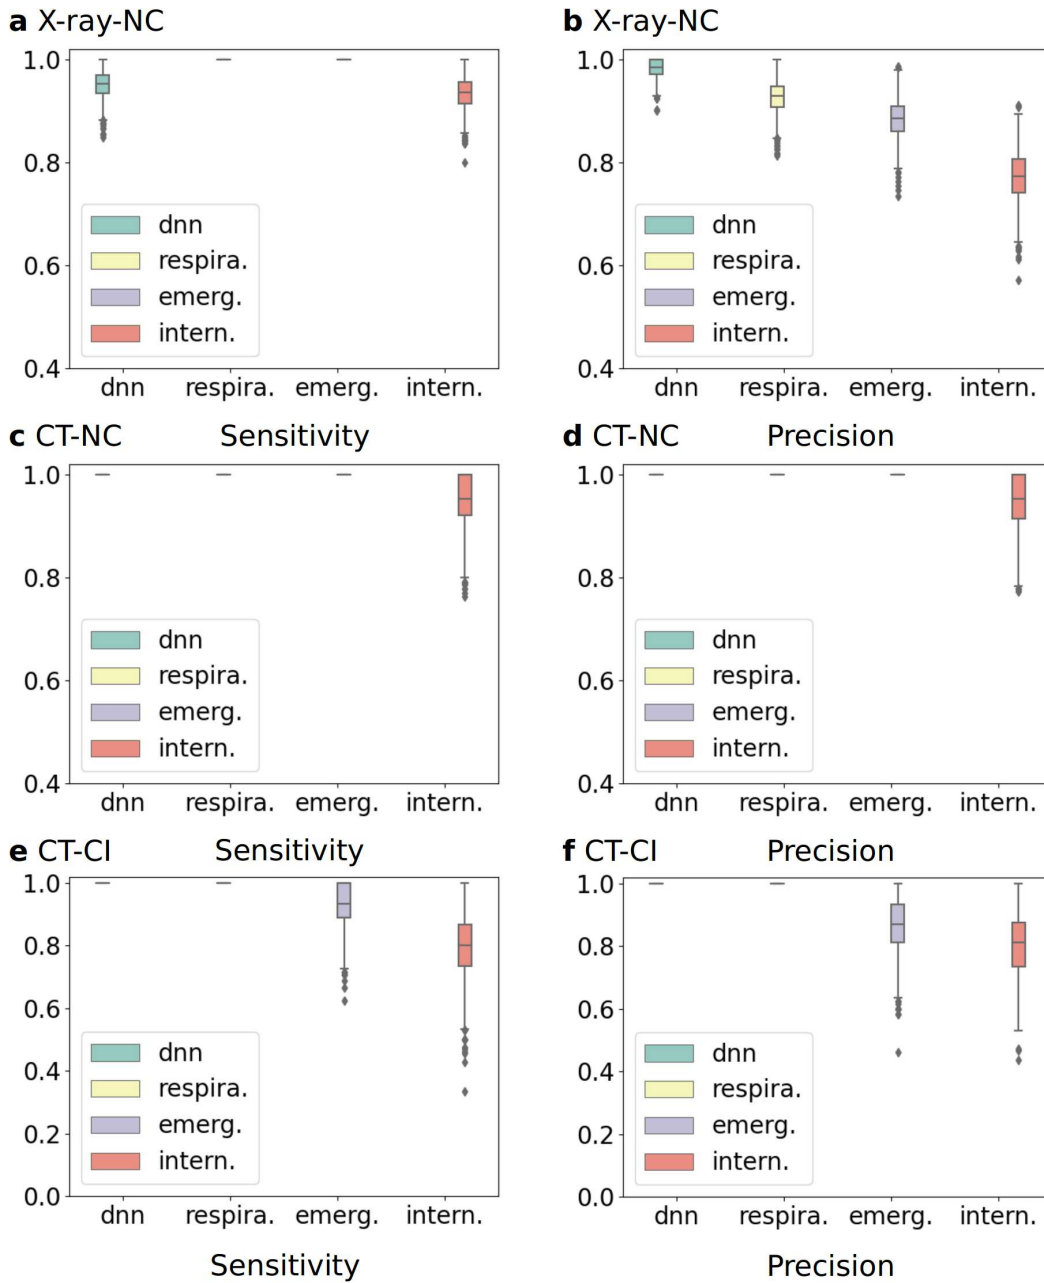

Supplementary Figure 2: Boxplots of precision and sensitivity for the CNNCF and expert results for COVID-19 identification. NC indicates that the positive case is a COVID-19 case, and the negative case is \*Normal. CI indicates that the positive case is COVID-19, and the negative case is influenza. Bootstrapping is used to generate 1000 resampled validation sets for XPVS, CTPVS and CTHVS.

51 **Supplementary Experiments and Tables**

Supplementary Table 1: Results of McNemar’s test for the CNNCF and expert results for COVID-19 and \*Normal cases for the X-data collected from CCD and RSNA datasets

|             | CNNCF/Respira. |           | CNNCF/Emerg. |           | CNNCF/Intern. |           | CNNCF/Rad-5th. |           | CNNCF/Rad-3rd. |           |
|-------------|----------------|-----------|--------------|-----------|---------------|-----------|----------------|-----------|----------------|-----------|
|             | p-value        | statistic | p-value      | statistic | p-value       | statistic | p-value        | statistic | p-value        | statistic |
| F1          | 1.0000         | 0.9725    | 1.0000       | 0.9323    | 1.0000        | 0.8421    | 1.0000         | 0.9667    | 1.0000         | 0.8308    |
| Kappa       | 1.0000         | 0.8852    | 1.0000       | 0.9477    | 1.0000        | 0.6896    | 1.0000         | 0.9535    | 1.0000         | 0.7576    |
| Specificity | 1.0000         | 0.9625    | 1.0000       | 0.9371    | 1.0000        | 0.8859    | 1.0000         | 0.9934    | 1.0000         | 0.8774    |
| Sensitivity | 1.0000         | 0.9701    | 1.0000       | 0.9701    | 1.0000        | 0.9138    | 1.0000         | 0.9508    | 1.0000         | 0.9474    |
| Precision   | 1.0000         | 0.9103    | 1.0000       | 0.8701    | 1.0000        | 0.8052    | 1.0000         | 0.9808    | 1.0000         | 0.7397    |

Supplementary Table 2: Results of McNemar’s Test for CNNCF and experts on distinct of COVID-19 and \*Normal cases by means of CT-data collected from Youan hospital and the LUNA-16 dataset

|             | CNNCF/Respira. |           | CNNCF/Emerg. |           | CNNCF/Intern. |           | CNNCF/Rad-5th. |           | CNNCF/Rad-3rd. |           |
|-------------|----------------|-----------|--------------|-----------|---------------|-----------|----------------|-----------|----------------|-----------|
|             | p-value        | statistic | p-value      | statistic | p-value       | statistic | p-value        | statistic | p-value        | statistic |
| F1          | 1.0000         | 1.0000    | 1.0000       | 1.0000    | 1.0000        | 0.9710    | 1.0000         | 1.0000    | 1.0000         | 0.9333    |
| Kappa       | 1.0000         | 1.0000    | 1.0000       | 1.0000    | 1.0000        | 0.9149    | 1.0000         | 1.0000    | 1.0000         | 0.8477    |
| Specificity | 1.0000         | 1.0000    | 1.0000       | 1.0000    | 1.0000        | 0.9630    | 1.0000         | 1.0000    | 1.0000         | 0.9412    |
| Sensitivity | 1.0000         | 1.0000    | 1.0000       | 1.0000    | 1.0000        | 0.9223    | 1.0000         | 1.0000    | 1.0000         | 0.9130    |
| Precision   | 1.0000         | 1.0000    | 1.0000       | 1.0000    | 1.0000        | 0.9532    | 1.0000         | 1.0000    | 1.0000         | 0.9545    |

Supplementary Table 3: Results of McNemar’s Test for CNNCF and experts on distinct of COVID-19 and influenza cases by means of CT-data collected from Youan hospital

|             | CNNCF/Respira. |           | CNNCF/Emerg. |           | CNNCF/Intern. |           | CNNCF/Rad-5th. |           | CNNCF/Rad-3rd. |           |
|-------------|----------------|-----------|--------------|-----------|---------------|-----------|----------------|-----------|----------------|-----------|
|             | p-value        | statistic | p-value      | statistic | p-value       | statistic | p-value        | statistic | p-value        | statistic |
| F1          | 1.0000         | 1.0000    | 1.0000       | 0.8841    | 1.0000        | 0.8427    | 1.0000         | 0.9333    | 1.0000         | 0.8333    |
| Kappa       | 1.0000         | 1.0000    | 1.0000       | 0.8551    | 1.0000        | 0.6260    | 1.0000         | 0.8837    | 1.0000         | 0.7473    |
| Specificity | 1.0000         | 1.0000    | 1.0000       | 0.9371    | 1.0000        | 0.8859    | 1.0000         | 0.9048    | 1.0000         | 0.9545    |
| Sensitivity | 1.0000         | 1.0000    | 1.0000       | 0.9506    | 1.0000        | 0.8022    | 1.0000         | 1.0000    | 1.0000         | 0.7692    |
| Precision   | 1.0000         | 1.0000    | 1.0000       | 0.8541    | 1.0000        | 0.7327    | 1.0000         | 0.8750    | 1.0000         | 0.9091    |

- 52 a. Experiment-E. The results of the five evaluation indicators for the comparison of the COVID-19 cases  
53 and \*Normal cases of the CTHVS are shown in Supplementary Table 1. The CNNCF exhibits good  
54 performance for the five evaluation indices, which are similar to that of the Respira., the Emerg. and  
55 the Rad-5th, and higher than that of the Intern and the Rad-3rd. The ROC scores are plotted in  
56 Supplementary Fig. 1-a; the AUROC of the CNNCF is 1.0. The precision-recall scores are shown in  
57 Supplementary Fig. 1-c; the AUPRC of the CNNCF is 1.0.
- 58 b. Experiment-F. The results of the five evaluation indicators for the comparison of the COVID-19 cases  
59 and pneumonia cases of the CTHVS are shown in Supplementary Table 1 where the \*Normal cases are  
60 from CTPVS and the COVID-19 cases are from the CTHVS. The CNNCF exhibits good performance for  
61 the five evaluation indices, which are similar to that of the Respira. and higher than that of the Intern,  
62 the Emerg, the Rad-5th and the Rad-3rd. The ROC scores are plotted in Supplementary Fig. 1-b; the  
63 AUROC of the CNNCF is 1.0. The precision-recall scores are shown in Supplementary Fig. 1-d; the  
64 AUPRC of the CNNCF is 1.0.

65 c. Experiment-G. The boxplots of the five evaluation indicators, the F1 score, the kappa coefficient, and the  
66 specificity of experiment E-F are shown in Supplementary Fig. 2, and the precision and sensitivity are  
67 shown in the supplementary Supplementary Fig. 3. Bootstrapping method as introduced in the main  
68 manuscript was used to calculate the empirical distributions, and McNemar’s test as introduced in the  
69 main manuscript was used to analyze the differences between the CNNCF and the experts. The p-values  
of the McNemar’s test (Supplementary Table 2-3) for the five evaluation indicators were all 1.0.

Supplementary Table 4: Performance indices of the classification framework (CNNCF) of the experiments E-F and the average performance of the 7th year respiratory resident (Respira.), the 3rd year emergency resident (Emerg.), the 1st year respiratory intern (Intern), the 5th year radiologist(Rad-5th) and the 3rd year radiologist(Rad-3rd).

|                    | CT(*Normal and COVID-19 cases from Youan hospital)   |                           |                           |                            |                           |                           |
|--------------------|------------------------------------------------------|---------------------------|---------------------------|----------------------------|---------------------------|---------------------------|
|                    | CNNCF                                                | Respire.                  | Emerg.                    | Intern.                    | Rad-5th                   | Rad-3rd                   |
| F1(95%CI)          | 1.0000<br>(1.0000,1.0000)                            | 1.0000<br>(1.0000,1.0000) | 1.0000<br>(1.0000,1.0000) | 0.9268<br>(0.8292,1.0000)  | 1.0000<br>(1.0000,1.0000) | 0.9744<br>(0.9143,1.0000) |
| Kappa(95%CI)       | 1.0000<br>(1.0000,1.0000)                            | 1.0000<br>(1.0000,1.0000) | 1.0000<br>(1.0000,1.0000) | 0.8500<br>(0.6700,1.0000)  | 1.0000<br>(1.0000,1.0000) | 0.9500<br>(0.8429,1.0000) |
| Specificity(95%CI) | 1.0000<br>(1.0000,1.0000)                            | 1.0000<br>(1.0000,1.0000) | 1.0000<br>(1.0000,1.0000) | 0.9000<br>(0.7497,1.0000)  | 1.0000<br>(1.0000,1.0000) | 1.0000<br>(1.0000,1.0000) |
| Sensitivity(95%CI) | 1.0000<br>(1.0000,1.0000)                            | 1.0000<br>(1.0000,1.0000) | 1.0000<br>(1.0000,1.0000) | 0.9500<br>(0.8333, 1.0000) | 1.0000<br>(1.0000,1.0000) | 0.9500<br>(0.8421,1.0000) |
| Precision(95%CI)   | 1.0000<br>(1.0000,1.0000)                            | 1.0000<br>(1.0000,1.0000) | 1.0000<br>(1.0000,1.0000) | 0.9048<br>(0.7646,1.0000)  | 1.0000<br>(1.0000,1.0000) | 1.0000<br>(1.0000,1.0000) |
|                    | CT(Pneumonia and COVID-19 cases from Youan hospital) |                           |                           |                            |                           |                           |
|                    | CNNCF                                                | Respire.                  | Emerg.                    | Intern.                    | Rad-5th                   | Rad-3rd                   |
| F1(95%CI)          | 1.0000<br>(1.0000,1.0000)                            | 1.0000<br>(1.0000,1.0000) | 0.9048<br>(0.7907,0.9787) | 0.8000<br>(0.6521,0.9143)  | 0.9744<br>(0.9129,1.0000) | 0.7391<br>(0.5714,0.8627) |
| Kappa(95%CI)       | 1.0000<br>(1.0000,1.0000)                            | 1.0000<br>(1.0000,1.0000) | 0.8678<br>(0.7283,0.9703) | 0.7158<br>(0.5357,0.8752)  | 0.9654<br>(0.8846,1.0000) | 0.6266<br>(0.4398,0.8031) |
| Specificity(95%CI) | 1.0000<br>(1.0000,1.0000)                            | 1.0000<br>(1.0000,1.0000) | 0.9455<br>(0.8823,1.0000) | 0.8727<br>(0.7800,0.9592)  | 1.0000<br>(1.0000,1.0000) | 0.8364<br>(0.7451,0.9299) |
| Sensitivity(95%CI) | 1.0000<br>(1.0000,1.0000)                            | 1.0000<br>(1.0000,1.0000) | 0.9500<br>(0.8333,1.0000) | 0.9000<br>(0.7598,1.0000)  | 0.9500<br>(0.8398,1.0000) | 0.8500<br>(0.6842,1.0000) |
| Precision(95%CI)   | 1.0000<br>(1.0000,1.0000)                            | 1.0000<br>(1.0000,1.0000) | 0.8636<br>(0.7000,1.0000) | 0.7200<br>(0.5357,0.8890)  | 1.0000<br>(1.0000,1.0000) | 0.6538<br>(0.4686,0.8335) |

70

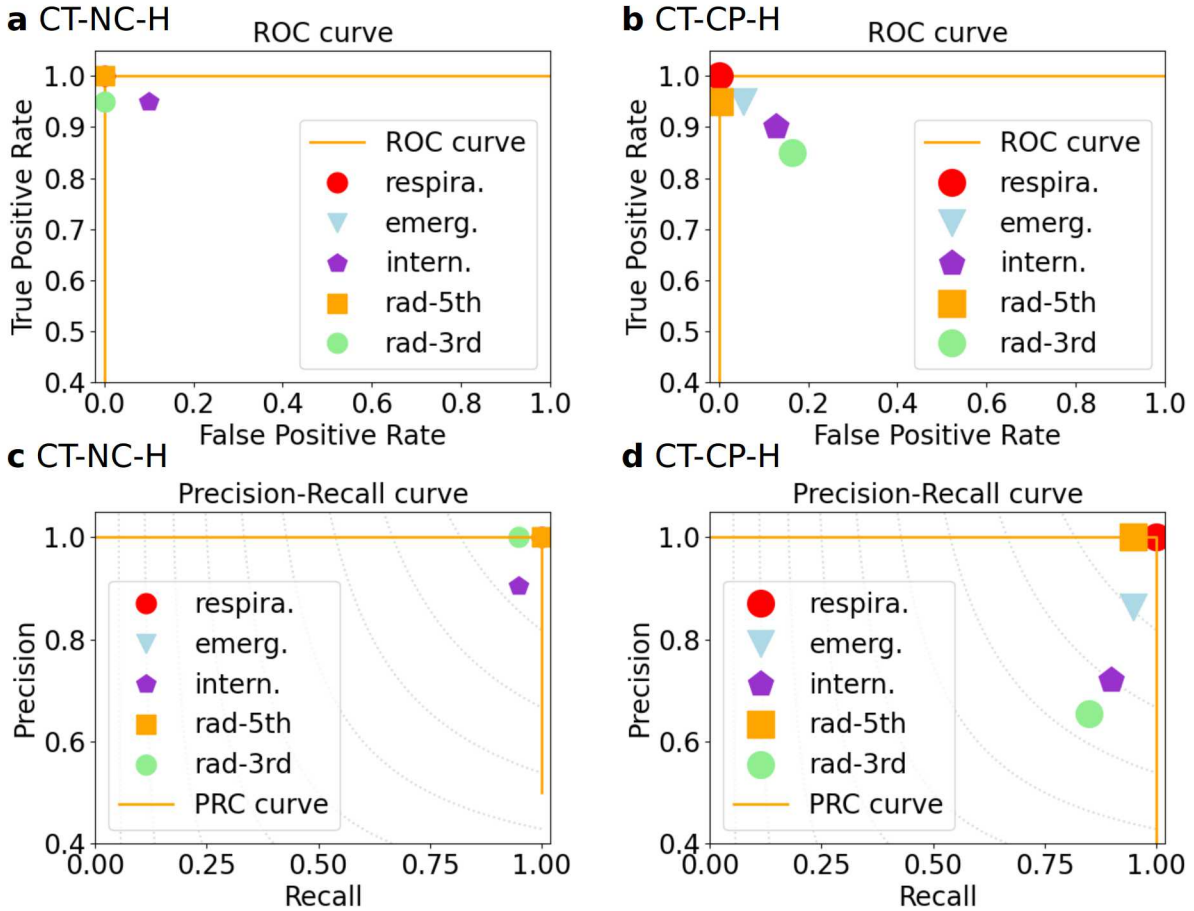

Supplementary Figure 3: ROC and PRC curves for the CNNCF and expert results for COVID-19 identification. NC indicates that the positive case is a COVID-19 case, and the negative case is \*Normal. CP indicates that the positive case is COVID-19, and the negative case is pneumonia. H indicated that the cases are collected from Youan hospital. Bootstrapping is used to generate 1000 resampled validation sets for CTHVS.

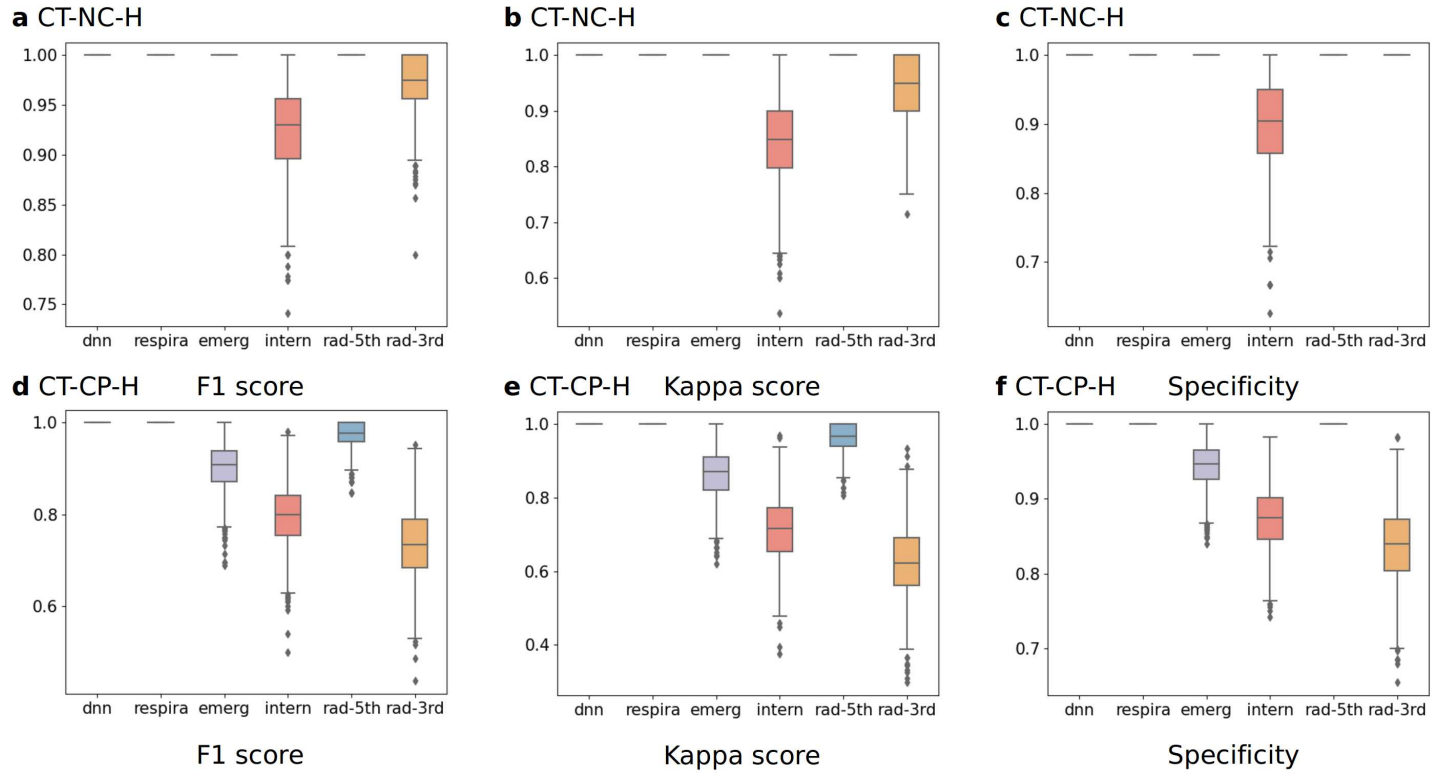

Supplementary Figure 4: Boxplots of f1-score, kappa score and specificity for the CNNCF and expert results for COVID-19 identification. NC indicates that the positive case is a COVID-19 case, and the negative case is \*Normal. CP indicates that the positive case is COVID-19, and the negative case is pneumonia. H indicated that the cases are collected from Youan hospital. Bootstrapping is used to generate 1000 resampled validation sets for CTHVS.



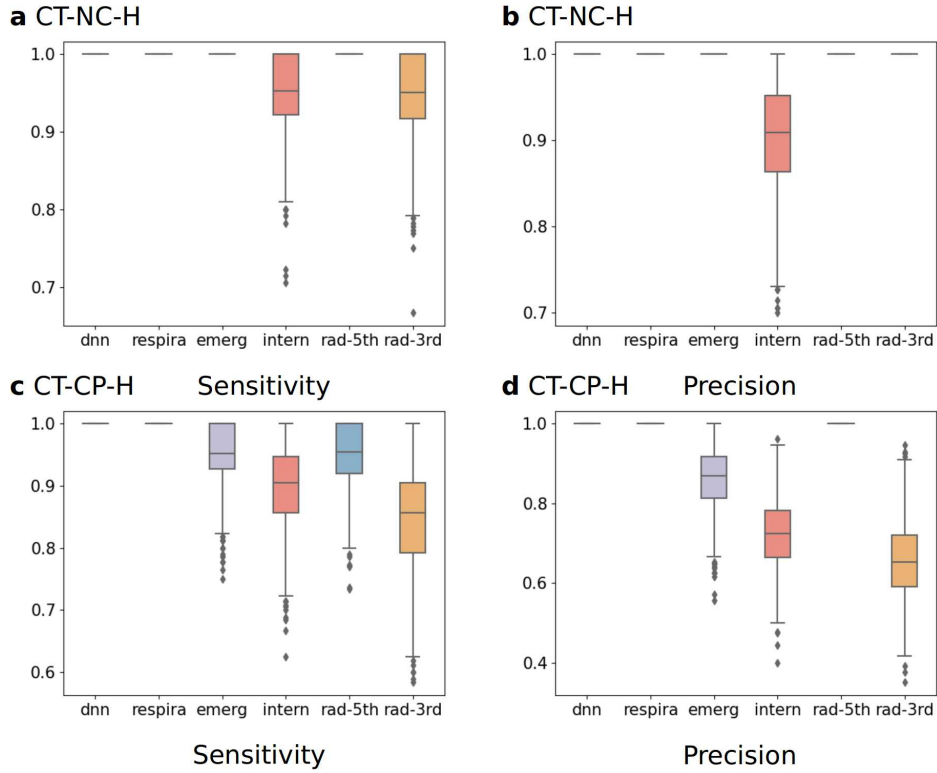

Supplementary Figure 5: Boxplots of precision and sensitivity for the CNNCF and expert results for COVID-19 identification. NC indicates that the positive case is a COVID-19 case, and the negative case is \*Normal. CP indicates that the positive case is COVID-19, and the negative case is pneumonia. H indicated that the cases are collected from Youan hospital. Bootstrapping is used to generate 1000 resampled validation sets for CTHVS.

Supplementary Table 5: Results of McNemar’s test for the CNNCF and expert results for COVID-19 and \*Normal cases for the CT-data collected from Youan hospital

|             | CNNCF/Respira. |           | CNNCF/Emerg. |           | CNNCF/Intern. |           | CNNCF/Rad-5th. |           | CNNCF/Rad-3rd. |           |
|-------------|----------------|-----------|--------------|-----------|---------------|-----------|----------------|-----------|----------------|-----------|
|             | p-value        | statistic | p-value      | statistic | p-value       | statistic | p-value        | statistic | p-value        | statistic |
| F1          | 1.0000         | 1.0000    | 1.0000       | 1.0000    | 1.0000        | 0.9200    | 1.0000         | 1.0000    | 1.0000         | 0.9778    |
| Kappa       | 1.0000         | 1.0000    | 1.0000       | 1.0000    | 1.0000        | 0.7872    | 1.0000         | 1.0000    | 1.0000         | 0.9492    |
| Specificity | 1.0000         | 1.0000    | 1.0000       | 1.0000    | 1.0000        | 0.9286    | 1.0000         | 1.0000    | 1.0000         | 1.0000    |
| Sensitivity | 1.0000         | 1.0000    | 1.0000       | 1.0000    | 1.0000        | 0.8846    | 1.0000         | 1.0000    | 1.0000         | 0.9565    |
| Precision   | 1.0000         | 1.0000    | 1.0000       | 1.0000    | 1.0000        | 0.9583    | 1.0000         | 1.0000    | 1.0000         | 1.0000    |

Supplementary Table 6: Results of McNemar’s test for the CNNCF and expert results for COVID-19 and pneumonia cases for the CT-data collected from Youan hospital

|             | CNNCF/Respira. |           | CNNCF/Emerg. |           | CNNCF/Intern. |           | CNNCF/Rad-5th. |           | CNNCF/Rad-3rd. |           |
|-------------|----------------|-----------|--------------|-----------|---------------|-----------|----------------|-----------|----------------|-----------|
|             | p-value        | statistic | p-value      | statistic | p-value       | statistic | p-value        | statistic | p-value        | statistic |
| F1          | 1.0000         | 1.0000    | 1.0000       | 0.9200    | 1.0000        | 0.7879    | 1.0000         | 1.0000    | 1.0000         | 0.8135    |
| Kappa       | 1.0000         | 1.0000    | 1.0000       | 0.8801    | 1.0000        | 0.7298    | 1.0000         | 0.9683    | 1.0000         | 0.6954    |
| Specificity | 1.0000         | 1.0000    | 1.0000       | 0.9412    | 1.0000        | 0.9016    | 1.0000         | 1.0000    | 1.0000         | 0.8163    |
| Sensitivity | 1.0000         | 1.0000    | 1.0000       | 0.9583    | 1.0000        | 0.9286    | 1.0000         | 0.9565    | 1.0000         | 0.9231    |
| Precision   | 1.0000         | 1.0000    | 1.0000       | 0.8846    | 1.0000        | 0.6842    | 1.0000         | 1.0000    | 1.0000         | 0.7273    |

- 71 d. Experiment-H. The results of the five evaluation indicators for the comparison of the COVID-19 cases and  
72 \*Normal cases of the XHVS are shown in supplementary Table 4. The CNNCF exhibits good performance  
73 with the best score of specificity of 96.00% which was similar to that of the Respire.(96.00%) and the Rad-  
74 5th(96.00%), and higher than that of the Emerg.(88.00%), the Intern.(80.00%) and the Rad-3rd(84.00%).  
75 The F1 score was 90.00%, which was similar to that of the Rad-5th(90.00%), higher than that of the  
76 Emerg.(81.82%), the Intern (69.57%) and the Rad-3rd (72.73%), and lower than that of the Respire.  
77 (95.24%). The kappa score was 86.00%, which was similar to that of the Rad-5th(86.00%), higher than  
78 that of the Emerg.(73.58%), the Intern (55.05%) and the Rad-3rd (60.38%), and lower than that of the  
79 Respire (93.20%).The sensitivity index was 90.00%, which was similar to that of the Emerg.(90.00%) and  
80 the Rad-5th(90.00%), higher than that of the Intern (80.00%) and the Rad-3rd (80.00%), and lower than  
81 that of the Respire. (100%). The Precision index was 90.00%, which was similar to that of the Rad-  
82 5th(90.00%), higher than that of the Emerg.(75.00%), the Intern (61.54%) and the Rad-3rd (66.67%),  
83 and lower than that of the Respire. (90.91%). The ROC scores are plotted in Supplementary Fig. 4-a;  
84 the AUROC of the CNNCF is 0.9920. The precision-recall scores are shown in Supplementary Fig. 4-d;  
85 the AUPRC of the CNNCF is 0.9799.
- 86 e. Experiment-I. The results of the five evaluation indicators for the comparison of the COVID-19 cases  
87 and influenza cases of the XHVS are shown in Supplementary Table 4. The CNNCF exhibits good  
88 performance with the best score of specificity of 95.56%, and a precision of 81.82%. The F1 score was  
89 85.71%, which was higher than that of the Rad-5th(81.82%), the Emerg.(80.00%), the Rad-3rd(64.00%)  
90 and the Intern.(59.26%) and lower than that of the Respire.(86.96%). The kappa score was 82.35%,  
91 which was higher than that of the Rad-5th(77.32%), the Emerg.(74.42%), the Rad-3rd(53.95%) and the  
92 Intern.(47.16%) and lower than that of the Respire.(83.58%). The sensitivity index was 90.00%, which was  
93 similar to that of the Rad-5th(90.00%), higher than that of the Rad-3rd(80.00%) and the Intern.(80.00%),  
94 and lower than that of the Respire.(100.00%) and the Emerg.(100.00%). The ROC scores are plotted in  
95 Supplementary Fig. 4-b; the AUROC of the CNNCF is 0.9956. The precision-recall scores are shown in  
96 Supplementary Fig. 4-e; the AUPRC of the CNNCF is 0.9799.
- 97 f. Experiment-J. The results of the five evaluation indicators for the comparison of the COVID-19 cases  
98 and pneumonia cases of the XHVS are shown in Supplementary Table 4. The CNNCF exhibits good

99 performance with the best score of specificity of 96.33%, and a precision of 81.82%. The F1 score was  
100 85.71%, which was higher than that of the Emerg.(80.00%), the Rad-3rd(64.00%) and the Intern.(61.54%)  
101 and lower than that of the Respire.(86.96%) and the Rad-5th(86.96%). The kappa score was 82.97%,  
102 which was higher than that of the Emerg.(75.47%), the Rad-3rd(55.85%) and the Intern.(52.55%) and  
103 lower than that of the Respire.(84.21%) and the Rad-5th(84.21%). The sensitivity index was 90.00%,  
104 which was higher than that of the Rad-3rd(80.00%) and the Intern.(80.00%), and lower than that of  
105 the Respire.(100.00%), the Rad-5th(100.00%) and the Emerg.(100.00%). The ROC scores are plotted in  
106 Supplementary Fig. 4-c; the AUROC of the CNNCF is 0.9964. The precision-recall scores are shown in  
107 Supplementary Fig. 4-f; the AUPRC of the CNNCF is 0.9799.

108 g. Experiment-K. The boxplots of the five evaluation indicators, the F1 score, the kappa coefficient, and the  
109 specificity of experiment H-J are shown in Supplementary Fig. 5, and the precision and sensitivity are  
110 shown in the supplementary Supplementary Fig. 6. Bootstrapping method as introduced in the main  
111 manuscript was used to calculate the empirical distributions, and McNemar's test as introduced in the  
112 main manuscript was used to analyze the differences between the CNNCF and the experts. The p-values  
113 of the McNemar's test (Supplementary Table 5-7) for the five evaluation indicators were all 1.0.

Supplementary Table 7: Performance indices of the classification framework (CNNCF) of the experiments H-J and the average performance of the 7th year respiratory resident (Respira.), the 3rd year emergency resident (Emerg.), the 1st year respiratory intern (Intern), the 5th year radiologist(Rad-5th) and the 3rd year radiologist(Rad-3rd).

|                    | X-data(*Normal and COVID-19 cases from Youan hospital)   |                           |                           |                           |                           |                           |
|--------------------|----------------------------------------------------------|---------------------------|---------------------------|---------------------------|---------------------------|---------------------------|
|                    | CNNCF                                                    | Respire.                  | Emerg.                    | Intern.                   | Rad-5th                   | Rad-3rd                   |
| F1(95%CI)          | 0.9000<br>(0.7143,1.0000)                                | 0.9524<br>(0.8182,1.0000) | 0.8182<br>(0.5882,0.9600) | 0.6957<br>(0.4286,0.8889) | 0.9000<br>(0.7143,1.0000) | 0.7273<br>(0.4346,0.9032) |
| Kappa(95%CI)       | 0.8600<br>(0.6181,1.0000)                                | 0.9320<br>(0.7586,1.0000) | 0.7358<br>(0.4615,0.9398) | 0.5505<br>(0.2553,0.8248) | 0.8600<br>(0.6390,1.0000) | 0.6038<br>(0.6390,1.0000) |
| Specificity(95%CI) | 0.9600<br>(0.8636,1.0000)                                | 0.9600<br>(0.8750,1.0000) | 0.8800<br>(0.7407,1.0000) | 0.8000<br>(0.6400,0.9525) | 0.9600<br>(0.8636,1.0000) | 0.8400<br>(0.6667,0.9643) |
| Sensitivity(95%CI) | 0.9000<br>(0.6667,1.0000)                                | 1.0000<br>(1.0000,1.0000) | 0.9000<br>(0.6667,1.0000) | 0.8000<br>(0.5325,1.0000) | 0.9000<br>(0.6667,1.0000) | 0.8000<br>(0.5000,1.0000) |
| Precision(95%CI)   | 0.9000<br>(0.6667,1.0000)                                | 0.9091<br>(0.6923,1.0000) | 0.7500<br>(0.5000,1.0000) | 0.6154<br>(0.3525,0.8750) | 0.9000<br>(0.6917,1.0000) | 0.6667<br>(0.3747,0.9231) |
|                    | X-data(Influenza and COVID-19 cases from Youan hospital) |                           |                           |                           |                           |                           |
|                    | CNNCF                                                    | Respire.                  | Emerg.                    | Intern.                   | Rad-5th                   | Rad-3rd                   |
| F1(95%CI)          | 0.8571<br>(0.6154,1.0000)                                | 0.8696<br>(0.6667,1.0000) | 0.8000<br>(0.5881,0.9524) | 0.5926<br>(0.3222,0.8000) | 0.8182<br>(0.6000,0.9600) | 0.6400<br>(0.3529,0.8333) |
| Kappa(95%CI)       | 0.8235<br>(0.5611,1.0000)                                | 0.8358<br>(0.6099,1.0000) | 0.7442<br>(0.5244,0.9412) | 0.4716<br>(0.1828,0.7176) | 0.7732<br>(0.5154,0.9483) | 0.5395<br>(0.2325,0.7732) |
| Specificity(95%CI) | 0.9556<br>(0.8863,1.0000)                                | 0.9333<br>(0.8478,1.0000) | 0.8889<br>(0.7857,0.9773) | 0.8000<br>(0.6665,0.9091) | 0.9333<br>(0.8511,1.0000) | 0.8444<br>(0.7380,0.9375) |
| Sensitivity(95%CI) | 0.9000<br>(0.6667,1.0000)                                | 1.0000<br>(1.0000,1.0000) | 1.0000<br>(1.0000,1.0000) | 0.8000<br>(0.5000,1.0000) | 0.9000<br>(0.6667,1.0000) | 0.8000<br>(0.5000,1.0000) |
| Precision(95%CI)   | 0.8182<br>(0.5333,1.0000)                                | 0.7692<br>(0.5000,1.0000) | 0.6667<br>(0.4167,0.9091) | 0.4706<br>(0.2143,0.7143) | 0.7500<br>(0.5000,1.0000) | 0.5333<br>(0.2500,0.7827) |
|                    | X-data(Pneumonia and COVID-19 cases from Youan hospital) |                           |                           |                           |                           |                           |
|                    | CNNCF                                                    | Respire.                  | Emerg.                    | Intern.                   | Rad-5th                   | Rad-3rd                   |
| F1(95%CI)          | 0.8571<br>(0.6316,1.0000)                                | 0.8696<br>(0.6956,1.0000) | 0.8000<br>(0.5881,0.9524) | 0.6154<br>(0.3199,0.8000) | 0.8696<br>(0.6667,1.0000) | 0.6400<br>(0.3636,0.8389) |
| Kappa(95%CI)       | 0.8297<br>(0.5761,1.0000)                                | 0.8421<br>(0.6448,1.0000) | 0.7547<br>(0.5301,0.9472) | 0.5255<br>(0.2169,0.7405) | 0.8421<br>(0.6242,1.0000) | 0.5585<br>(0.2687,0.7979) |
| Specificity(95%CI) | 0.9636<br>(0.9074,1.0000)                                | 0.9455<br>(0.8800,1.0000) | 0.9091<br>(0.8302,0.9815) | 0.8545<br>(0.7500,0.9376) | 0.9455<br>(0.8813,1.0000) | 0.8727<br>(0.7736,0.9608) |
| Sensitivity(95%CI) | 0.9000<br>(0.6667,1.0000)                                | 1.0000<br>(1.0000,1.0000) | 1.0000<br>(1.0000,1.0000) | 0.8000<br>(0.5000,1.0000) | 1.0000<br>(1.0000,1.0000) | 0.8000<br>(0.5000,1.0000) |
| Precision(95%CI)   | 0.8182<br>(0.5556,1.0000)                                | 0.7692<br>(0.5332,1.0000) | 0.6667<br>(0.4165,0.9091) | 0.5000<br>(0.2220,0.7333) | 0.7692<br>(0.5000,1.0000) | 0.5333<br>(0.2777,0.8000) |

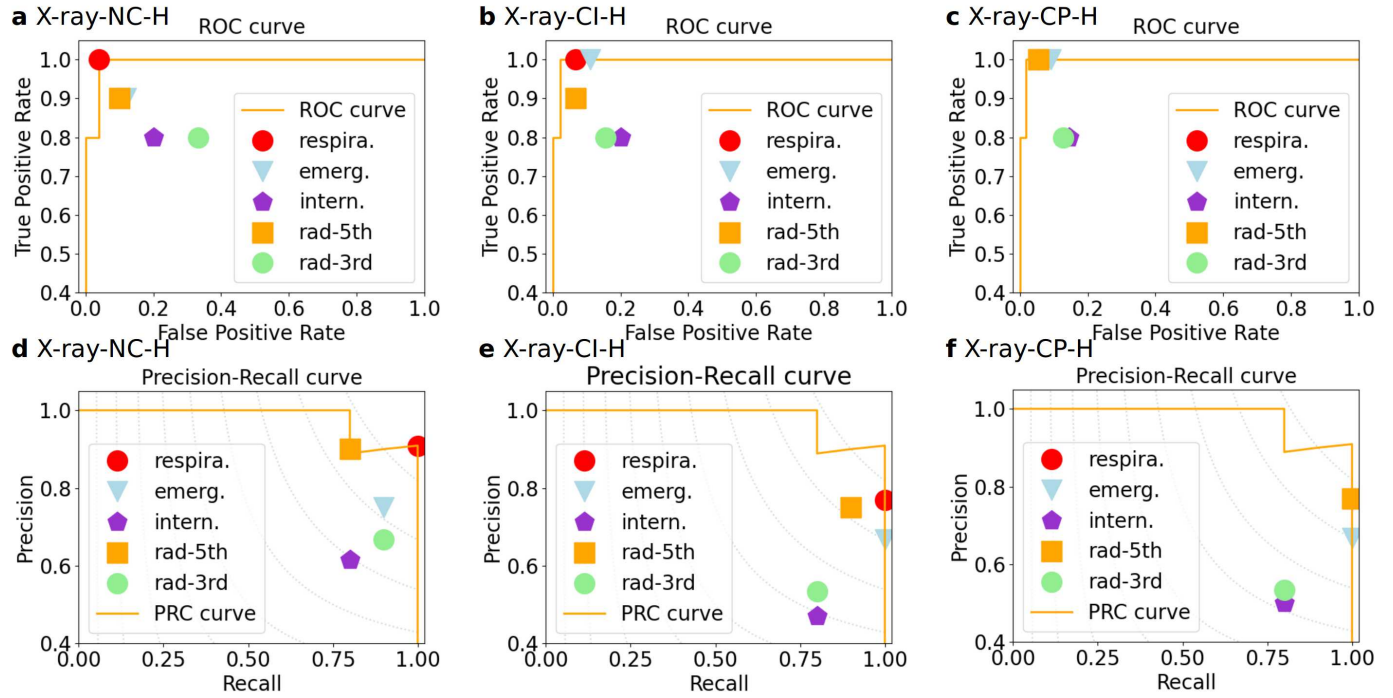

Supplementary Figure 6: ROC and PRC curves for the CNNCF and expert results for COVID-19 identification. NC indicates that the positive case is a COVID-19 case, and the negative case is \*Normal. CI indicates that the positive case is COVID-19, and the negative case is influenza. CP indicates that the positive case is COVID-19, and the negative case is pneumonia. H indicated that the cases are collected from Youan hospital. Bootstrapping is used to generate 1000 resampled validation sets for XHVS.

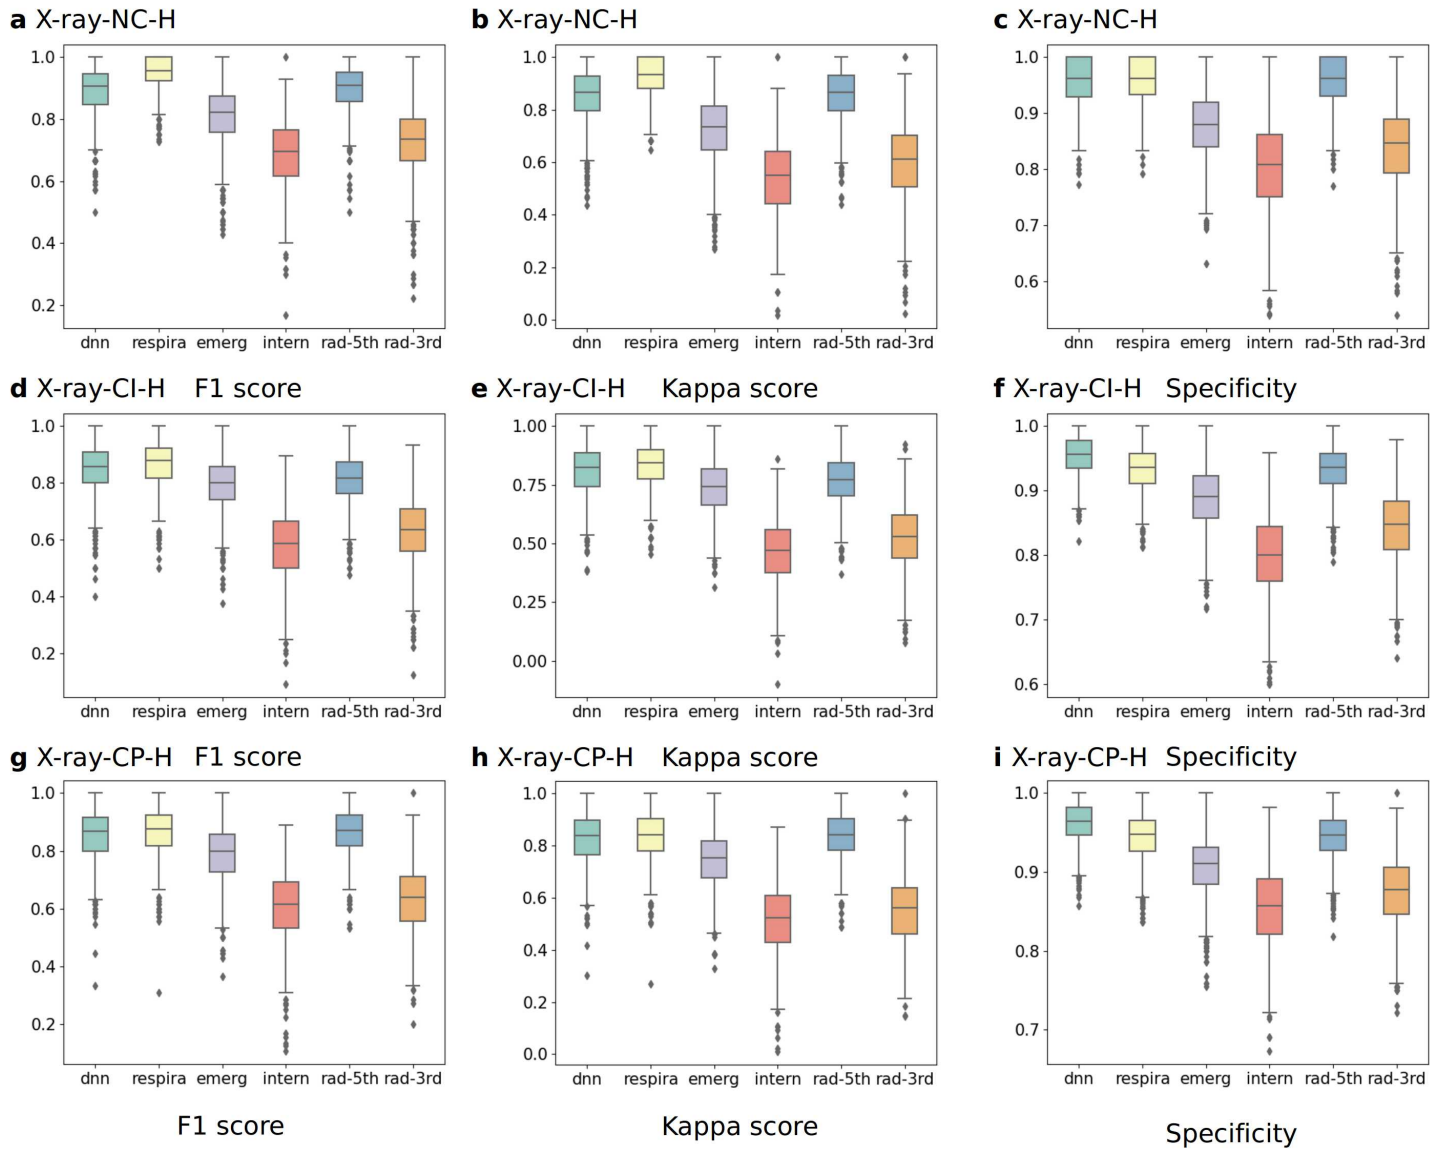

Supplementary Figure 7: Boxplots of f1-score, kappa score and specificity for the CNNCF and expert results for COVID-19 identification. NC indicates that the positive case is a COVID-19 case, and the negative case is \*Normal. CI indicates that the positive case is COVID-19, and the negative case is influenza. CP indicates that the positive case is COVID-19, and the negative case is pneumonia. H indicated that the cases are collected from Youan hospital. Bootstrapping is used to generate 1000 resampled validation sets for XHVS.

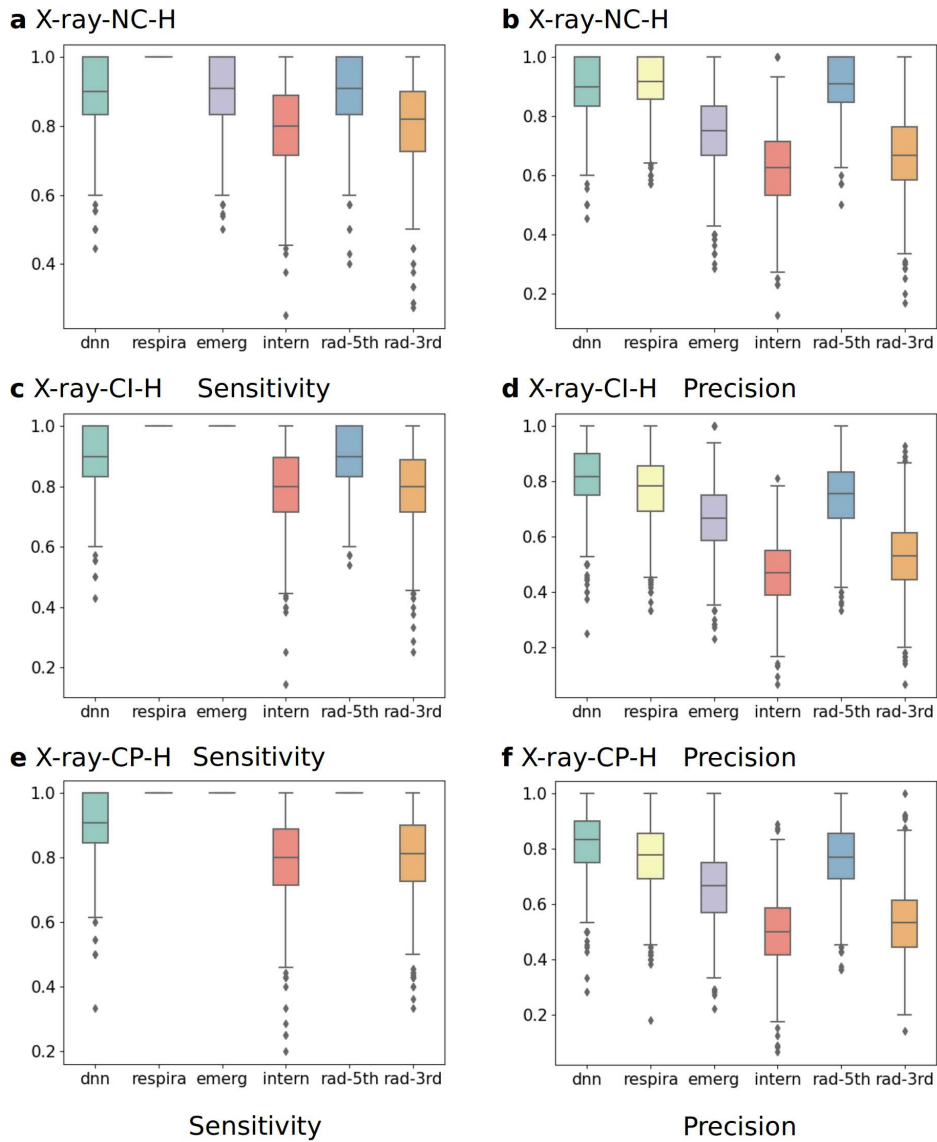

Supplementary Figure 8: Boxplots of precision and sensitivity for the CNNCF and expert results for COVID-19 identification. NC indicates that the positive case is a COVID-19 case, and the negative case is \*Normal. CI indicates that the positive case is COVID-19, and the negative case is influenza. CP indicates that the positive case is COVID-19, and the negative case is pneumonia. H indicated that the cases are collected from Youan hospital. Bootstrapping is used to generate 1000 resampled validation sets for XHVS.

Supplementary Table 8: Results of McNemar’s test for the CNNCF and expert results for COVID-19 and \*Normal cases for the X-data collected from Youan hospital

|             | CNNCF/Respira. |           | CNNCF/Emerg. |           | CNNCF/Intern. |           | CNNCF/Rad-5th. |           | CNNCF/Rad-3rd. |           |
|-------------|----------------|-----------|--------------|-----------|---------------|-----------|----------------|-----------|----------------|-----------|
|             | p-value        | statistic | p-value      | statistic | p-value       | statistic | p-value        | statistic | p-value        | statistic |
| F1          | 1.0000         | 0.8750    | 1.0000       | 0.7778    | 1.0000        | 0.8125    | 1.0000         | 0.8889    | 1.0000         | 0.8148    |
| Kappa       | 1.0000         | 0.8387    | 1.0000       | 0.7059    | 1.0000        | 0.6557    | 1.0000         | 0.8511    | 1.0000         | 0.7009    |
| Specificity | 1.0000         | 0.9286    | 1.0000       | 0.8571    | 1.0000        | 0.8000    | 1.0000         | 1.0000    | 1.0000         | 0.8261    |
| Sensitivity | 1.0000         | 0.8333    | 1.0000       | 0.8333    | 1.0000        | 0.8333    | 1.0000         | 0.8333    | 1.0000         | 0.8333    |
| Precision   | 1.0000         | 0.7778    | 1.0000       | 0.6364    | 1.0000        | 0.7647    | 1.0000         | 1.0000    | 1.0000         | 0.7333    |

Supplementary Table 9: Results of McNemar’s test for the CNNCF and expert results for COVID-19 and influenza cases for the X-data collected from Youan hospital

|             | CNNCF/Respira. |           | CNNCF/Emerg. |           | CNNCF/Intern. |           | CNNCF/Rad-5th. |           | CNNCF/Rad-3rd. |           |
|-------------|----------------|-----------|--------------|-----------|---------------|-----------|----------------|-----------|----------------|-----------|
|             | p-value        | statistic | p-value      | statistic | p-value       | statistic | p-value        | statistic | p-value        | statistic |
| F1          | 1.0000         | 0.8571    | 1.0000       | 0.7200    | 1.0000        | 0.5600    | 1.0000         | 0.7692    | 1.0000         | 0.7273    |
| Kappa       | 1.0000         | 0.8243    | 1.0000       | 0.6458    | 1.0000        | 0.4434    | 1.0000         | 0.6984    | 1.0000         | 0.6598    |
| Specificity | 1.0000         | 0.9348    | 1.0000       | 0.8478    | 1.0000        | 0.8043    | 1.0000         | 0.9070    | 1.0000         | 0.9111    |
| Sensitivity | 1.0000         | 1.0000    | 1.0000       | 1.0000    | 1.0000        | 0.7778    | 1.0000         | 0.8333    | 1.0000         | 0.8000    |
| Precision   | 1.0000         | 0.7500    | 1.0000       | 0.5625    | 1.0000        | 0.4375    | 1.0000         | 0.7143    | 1.0000         | 0.6667    |

Supplementary Table 10: Results of McNemar’s test for the CNNCF and expert results for COVID-19 and pneumonia cases for the X-data collected from Youan hospital

|             | CNNCF/Respira. |           | CNNCF/Emerg. |           | CNNCF/Intern. |           | CNNCF/Rad-5th. |           | CNNCF/Rad-3rd. |           |
|-------------|----------------|-----------|--------------|-----------|---------------|-----------|----------------|-----------|----------------|-----------|
|             | p-value        | statistic | p-value      | statistic | p-value       | statistic | p-value        | statistic | p-value        | statistic |
| F1          | 1.0000         | 0.8889    | 1.0000       | 0.7778    | 1.0000        | 0.7143    | 1.0000         | 0.8333    | 1.0000         | 0.5926    |
| Kappa       | 1.0000         | 0.8713    | 1.0000       | 0.7441    | 1.0000        | 0.6404    | 1.0000         | 0.7969    | 1.0000         | 0.4874    |
| Specificity | 1.0000         | 0.9636    | 1.0000       | 0.9310    | 1.0000        | 0.8704    | 1.0000         | 0.9273    | 1.0000         | 0.8679    |
| Sensitivity | 1.0000         | 1.0000    | 1.0000       | 1.0000    | 1.0000        | 0.9091    | 1.0000         | 1.0000    | 1.0000         | 0.6667    |
| Precision   | 1.0000         | 0.8000    | 1.0000       | 0.6364    | 1.0000        | 0.5882    | 1.0000         | 0.7143    | 1.0000         | 0.5333    |



- 114 h. Experiment-L. The results of the five evaluation indicators for the comparison of the pneumonia cases  
115 and the \*Normal cases of the XPVS are shown in Supplementary Table 8. The CNNCF exhibits good  
116 performance with the best score of F1 score of 97.49%, a kappa score of 95.00%, a specificity of 98.00%  
117 and a precision of 97.98%. The sensitivity index was 97.00%, which was similar to that of the Rad-  
118 5th(97.00%), higher than that of the Emerg.(96.04%), Rad-3rd(94.00%) and the Intern.(93.00%), and  
119 lower than that of the Respire.(98.00%). The ROC scores are plotted in Supplementary Fig. 7-a; the  
120 AUROC of the CNNCF is 0.9970. The precision-recall scores are shown in Supplementary Fig. 7-c; the  
121 AUPRC of the CNNCF is 0.9964.
- 122 i. Experiment-M. The results of the five evaluation indicators for the comparison of the \*Normal cases  
123 and the pneumonia cases of the CTPVS are shown in Supplementary Table 8. The CNNCF exhibits  
124 good performance for the five evaluation indices, which are similar to that of the Respire., the Emerg.  
125 and the Rad-5th and higher than that of the Intern and the Rad-3rd. The ROC scores are plotted in  
126 Supplementary Fig. 7-b; the AUROC of the CNNCF is 1.0. The precision-recall scores are shown in  
127 Supplementary Fig. 7-d; the AUPRC of the CNNCF is 1.0.
- 128 j. Experiment-N. The boxplots of the five evaluation indicators, the F1 score, the kappa coefficient, and the  
129 specificity of experiment L-M are shown in supplementary Fig. 8, and the precision and sensitivity are  
130 shown in the supplementary Fig. 9. Bootstrapping method as introduced in the main manuscript was  
131 used to calculate the empirical distributions, and McNemar’s test as introduced in the main manuscript  
132 was used to analyze the differences between the CNNCF and the experts. The p-values of the McNemar’s  
133 test (Supplementary Table 9-10) for the five evaluation indicators were all 1.0.

Supplementary Table 11: Performance indices of the classification framework (CNNCF) of the experiments L-M and the average performance of the 7th year respiratory resident (Respira.), the 3rd year emergency resident (Emerg.), the 1st year respiratory intern (Intern), the 5th year radiologist(Rad-5th) and the 3rd year radiologist(Rad-3rd).

|                    | X-data(Pneumonia and *Normal cases from RSNA dataset)  |                           |                           |                           |                           |                           |
|--------------------|--------------------------------------------------------|---------------------------|---------------------------|---------------------------|---------------------------|---------------------------|
|                    | CNNCF                                                  | Respire.                  | Emerg.                    | Intern.                   | Rad-5th                   | Rad-3rd                   |
| F1(95%CI)          | 0.9749<br>(0.9508,0.9951)                              | 0.9703<br>(0.9442,0.9905) | 0.9510<br>(0.9159,0.9792) | 0.9163<br>(0.8764,0.9540) | 0.9700<br>(0.9456,0.9901) | 0.9307<br>(0.8950,0.9622) |
| Kappa(95%CI)       | 0.9500<br>(0.8999,0.9899)                              | 0.9400<br>(0.8896,0.9800) | 0.9091<br>(0.8387,0.9595) | 0.8300<br>(0.7500,0.9004) | 0.9400<br>(0.8900,0.9800) | 0.8600<br>(0.7899,0.9200) |
| Specificity(95%CI) | 0.9800<br>(0.9490,1.0000)                              | 0.9600<br>(0.9174,0.9909) | 0.9400<br>(0.8900,0.9810) | 0.9000<br>(0.8381,0.9550) | 0.9700<br>(0.9346,1.0000) | 0.9200<br>(0.8627,0.9700) |
| Sensitivity(95%CI) | 0.9700<br>(0.9327,1.0000)                              | 0.9800<br>(0.9490,1.0000) | 0.9604<br>(0.9175,0.9904) | 0.9300<br>(0.8735,0.9727) | 0.9700<br>(0.9314,1.0000) | 0.9400<br>(0.8925,0.9806) |
| Precision(95%CI)   | 0.9798<br>(0.9478,1.0000)                              | 0.9608<br>(0.9216,0.9907) | 0.9417<br>(0.8952,0.9815) | 0.9029<br>(0.8400,0.9529) | 0.9700<br>(0.9340,1.0000) | 0.9216<br>(0.8667,0.9688) |
|                    | CT(Pneumonia and *Normal cases from ICPNP and LUNA-16) |                           |                           |                           |                           |                           |
|                    | CNNCF                                                  | Respire.                  | Emerg.                    | Intern.                   | Rad-5th                   | Rad-3rd                   |
| F1(95%CI)          | 1.0000<br>(1.0000,1.0000)                              | 1.0000<br>(1.0000,1.0000) | 1.0000<br>(1.0000,1.0000) | 0.9268<br>(0.8204,1.0000) | 1.0000<br>(1.0000,1.0000) | 0.9756<br>(0.9143,1.0000) |
| Kappa(95%CI)       | 1.0000<br>(1.0000,1.0000)                              | 1.0000<br>(1.0000,1.0000) | 1.0000<br>(1.0000,1.0000) | 0.8500<br>(0.6500,1.0000) | 1.0000<br>(1.0000,1.0000) | 0.9500<br>(0.8387,1.0000) |
| Specificity(95%CI) | 1.0000<br>(1.0000,1.0000)                              | 1.0000<br>(1.0000,1.0000) | 1.0000<br>(1.0000,1.0000) | 0.9000<br>(0.7500,1.0000) | 1.0000<br>(1.0000,1.0000) | 0.9500<br>(0.8333,1.0000) |
| Sensitivity(95%CI) | 1.0000<br>(1.0000,1.0000)                              | 1.0000<br>(1.0000,1.0000) | 1.0000<br>(1.0000,1.0000) | 0.9500<br>(0.8333,1.0000) | 1.0000<br>(1.0000,1.0000) | 1.0000<br>(1.0000,1.0000) |
| Precision(95%CI)   | 1.0000<br>(1.0000,1.0000)                              | 1.0000<br>(1.0000,1.0000) | 1.0000<br>(1.0000,1.0000) | 0.9048<br>(0.7725,1.0000) | 1.0000<br>(1.0000,1.0000) | 0.9524<br>(0.8421,1.0000) |

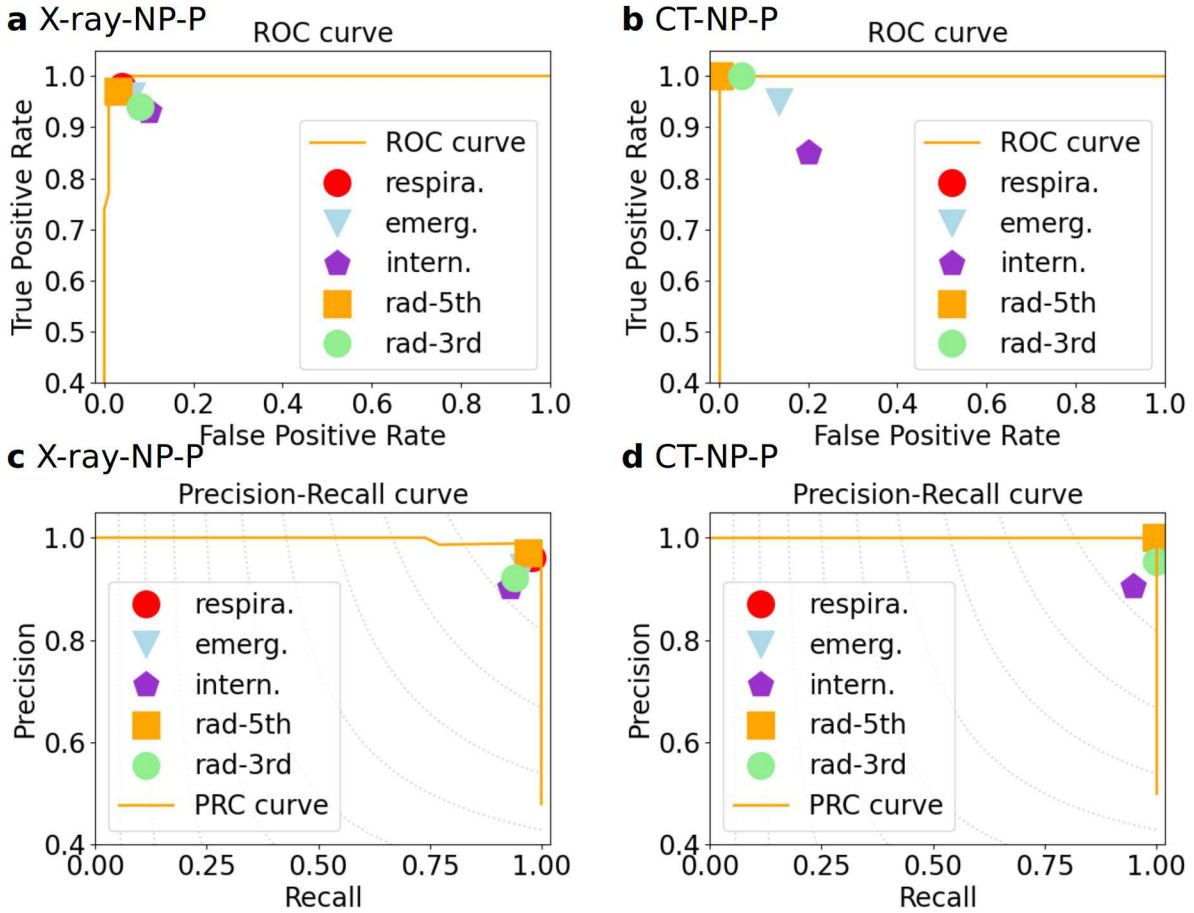

Supplementary Figure 9: ROC and PRC curves for the CNNCF and expert results for COVID-19 identification. NP indicates that the positive case is a pneumonia case, and the negative case is \*Normal. CP indicates that the positive case is COVID-19, and the negative case is pneumonia. P indicated that the cases are collected from public datasets. Bootstrapping is used to generate 1000 resampled validation sets for XPVS and CTPVS.

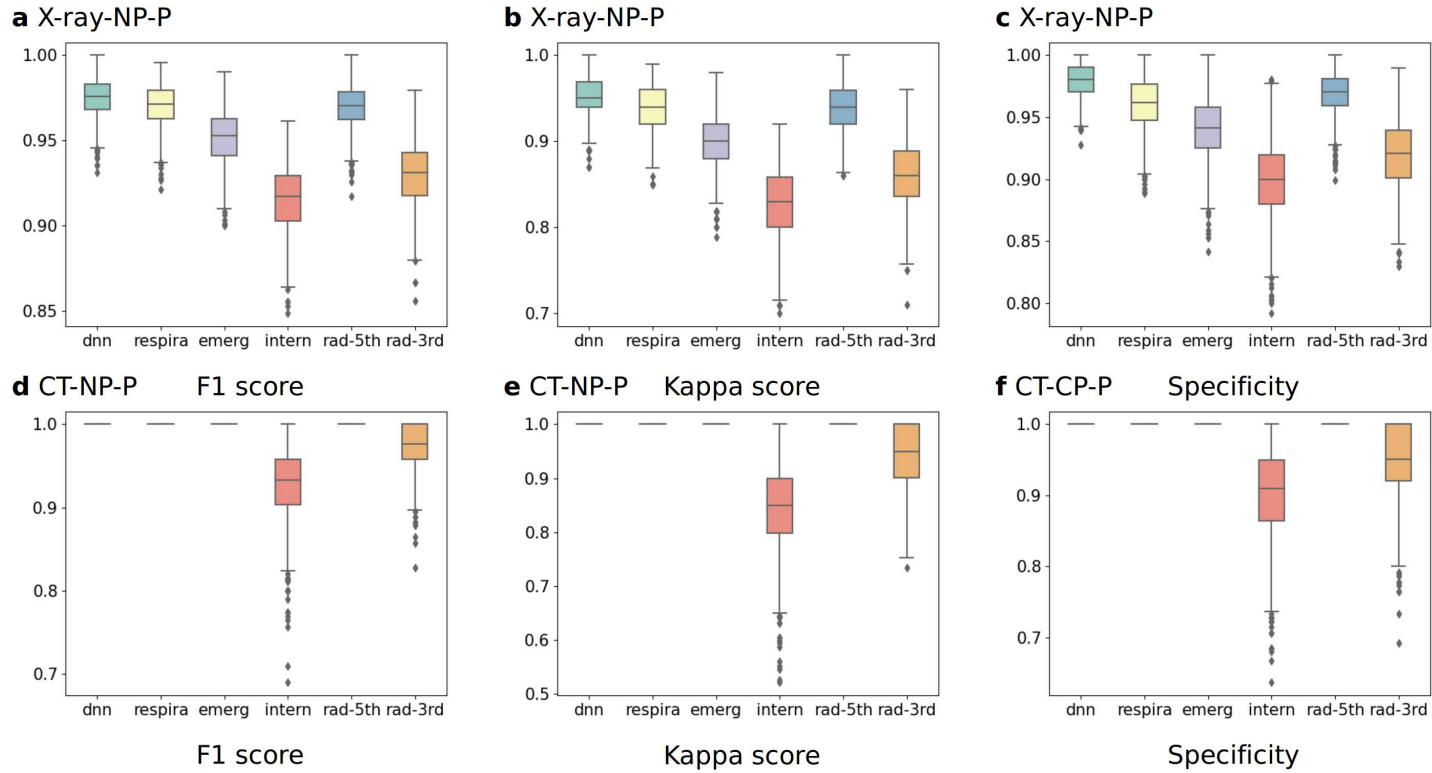

Supplementary Figure 10: Boxplots of f1-score, kappa score and specificity for the CNNCF and expert results for pneumonia identification. NP indicates that the positive case is a pneumonia case, and the negative case is \*Normal. P indicated that the cases are collected from public datasets. Bootstrapping is used to generate 1000 resampled validation sets for XPVS and CTPVS.

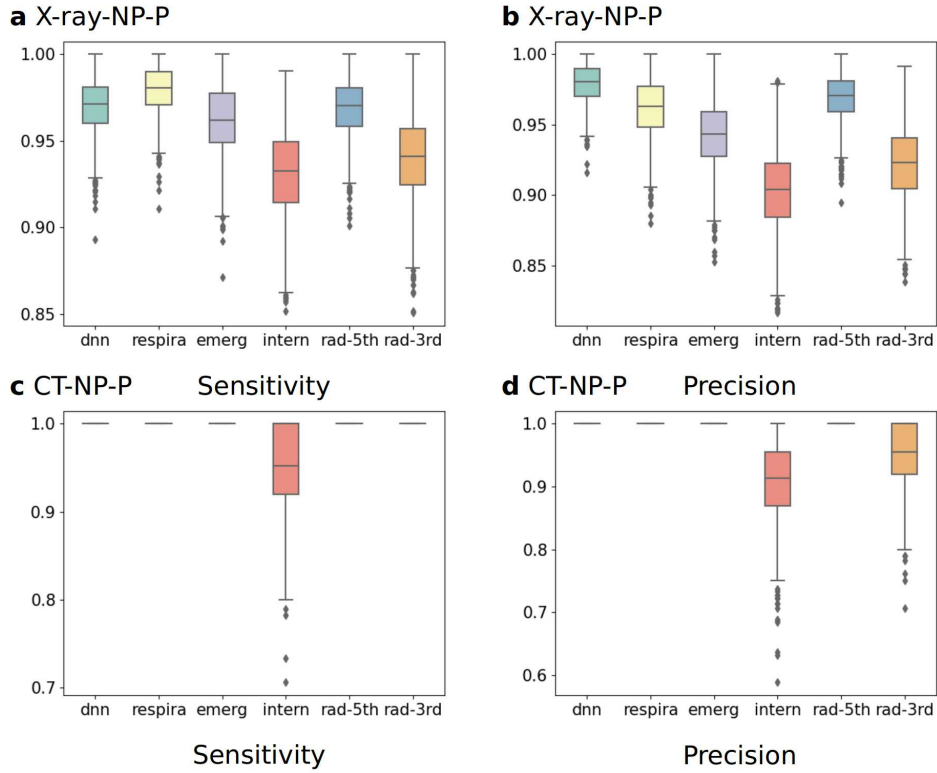

Supplementary Figure 11: Boxplots of precision and sensitivity for the CNNCF and expert results for pneumonia identification. NP indicates that the positive case is a pneumonia case, and the negative case is \*Normal. P indicated that the cases are collected from public datasets. Bootstrapping is used to generate 1000 resampled validation sets for XPVS and CTPVS.

Supplementary Table 12: Results of McNemar’s test for the CNNCF and expert results for pneumonia and \*Normal cases for the X-data collected from RSNA dataset

|             | CNNCF/Respira. |           | CNNCF/Emerg. |           | CNNCF/Intern. |           | CNNCF/Rad-5th. |           | CNNCF/Rad-3rd. |           |
|-------------|----------------|-----------|--------------|-----------|---------------|-----------|----------------|-----------|----------------|-----------|
|             | p-value        | statistic | p-value      | statistic | p-value       | statistic | p-value        | statistic | p-value        | statistic |
| F1          | 1.0000         | 0.9770    | 1.0000       | 0.9359    | 1.0000        | 0.8854    | 1.0000         | 0.9738    | 1.0000         | 0.9458    |
| Kappa       | 1.0000         | 0.9593    | 1.0000       | 0.8701    | 1.0000        | 0.7798    | 1.0000         | 0.9499    | 1.0000         | 0.8901    |
| Specificity | 1.0000         | 0.9911    | 1.0000       | 0.9109    | 1.0000        | 0.9208    | 1.0000         | 0.9808    | 1.0000         | 0.9029    |
| Sensitivity | 1.0000         | 0.9659    | 1.0000       | 0.9596    | 1.0000        | 0.8586    | 1.0000         | 0.9659    | 1.0000         | 0.9659    |
| Precision   | 1.0000         | 0.9884    | 1.0000       | 0.9135    | 1.0000        | 0.9140    | 1.0000         | 0.9789    | 1.0000         | 0.9057    |

Supplementary Table 13: Results of McNemar’s test for the CNNCF and expert results for pneumonia and \*Normal cases for the CT-data collected from ICNP and LUNA-16 dataset

|             | CNNCF/Respira. |           | CNNCF/Emerg. |           | CNNCF/Intern. |           | CNNCF/Rad-5th. |           | CNNCF/Rad-3rd. |           |
|-------------|----------------|-----------|--------------|-----------|---------------|-----------|----------------|-----------|----------------|-----------|
|             | p-value        | statistic | p-value      | statistic | p-value       | statistic | p-value        | statistic | p-value        | statistic |
| F1          | 1.0000         | 1.0000    | 1.0000       | 1.0000    | 1.0000        | 0.8947    | 1.0000         | 1.0000    | 1.0000         | 0.9756    |
| Kappa       | 1.0000         | 1.0000    | 1.0000       | 1.0000    | 1.0000        | 0.8000    | 1.0000         | 1.0000    | 1.0000         | 0.9500    |
| Specificity | 1.0000         | 1.0000    | 1.0000       | 1.0000    | 1.0000        | 0.8636    | 1.0000         | 1.0000    | 1.0000         | 0.9500    |
| Sensitivity | 1.0000         | 1.0000    | 1.0000       | 1.0000    | 1.0000        | 0.9444    | 1.0000         | 1.0000    | 1.0000         | 1.0000    |
| Precision   | 1.0000         | 1.0000    | 1.0000       | 1.0000    | 1.0000        | 0.8500    | 1.0000         | 1.0000    | 1.0000         | 1.0000    |

134 k. Experiment-O. The results of the five evaluation indicators for the comparison of the pneumonia cases,  
135 the \*Normal cases and the COVID-19 cases of the XMVS are shown in Supplementary Table 11. The  
136 CNNCF exhibits good performance on distinct of \*Normal and COVID-19 cases with the best score of  
137 specificity of 98.86% and a precision of 97.14%. The F1 score was 95.77%, which was similar to that of  
138 the Respire.(96.00%), higher than that of the Emerg.(92.21%), Rad-3rd(84.08%) and the Intern.(82.50%),  
139 and lower than that of the Rad-5th(97.26%). The kappa score was 94.07%, which was similar to that of  
140 the Respire.(94.26%), higher than that of the Emerg.(88.70%), Rad-3rd(76.73%) and the Intern.(74.24%),  
141 and lower than that of the Rad-5th(96.11%). The specificity of 98.00% The sensitivity index was 94.44%,  
142 which was higher than that of Rad-3rd(91.67%) and the Intern.(91.67%), and lower than that of the  
143 Rad-5th(98.61%),the Emerg.(98.61%), and the Respire.(100.00%). Similar performance of the CNNCF  
144 was also achieved on distinct of Pneumonia and COVID-19 cases which was also shown in Table 11. The  
145 ROC scores for distinguishing COVID-19 from \*Normal cases are plotted in Supplementary Fig. 10-a; the  
146 AUROC of the CNNCF is 0.9972. The precision-recall scores for distinguishing COVID-19 from \*Normal  
147 cases are shown in Supplementary Fig. 10-c; the AUPRC of the CNNCF is 0.9948. The ROC scores for  
148 distinguishing COVID-19 from Pneumonia cases are plotted in Supplementary Fig. 10-b; the AUROC  
149 of the CNNCF is 0.9943. The precision-recall scores for distinguishing COVID-19 from Pneumonia cases  
150 are shown in Supplementary Fig. 10-d; the AUPRC of the CNNCF is 0.9899.

151 l. Experiment-P. The results of the five evaluation indicators for the comparison of the pneumonia cases,  
152 the \*Normal cases and the COVID-19 cases of the CTMVS are shown in Supplementary Table 14. The  
153 CNNCF exhibits good performance on distinct of \*Normal and COVID-19 cases for the five evaluation  
154 indices, which are similar to that of the Respire., the Emerg. and the Rad-5th and higher than that of the  
155 Intern and the Rad-3rd. Similar performance of the CNNCF was also achieved on distinct of Pneumonia  
156 and COVID-19 cases which was also shown in Table 14. The ROC scores for distinguishing COVID-19  
157 from \*Normal cases are plotted in Supplementary Fig. 11-a; the AUROC of the CNNCF is 1.0. The  
158 precision-recall scores for distinguishing COVID-19 from \*Normal cases are shown in Supplementary Fig.  
159 11-c; the AUPRC of the CNNCF is 1.0. The ROC scores for distinguishing COVID-19 from Pneumonia  
160 cases are plotted in Supplementary Fig. 11-b; the AUROC of the CNNCF is 0.9991. The precision-recall  
161 scores for distinguishing COVID-19 from Pneumonia cases are shown in Supplementary Fig. 11-d; the

162

AUPRC of the CNNCF is 0.9997.

163

m. Experiment-Q. The boxplots of the five evaluation indicators, the F1 score, the kappa coefficient, and the specificity of experiment O-P are shown in supplementary Fig. 12 and Fig. 13, and the precision and sensitivity are shown in the supplementary Fig. 14 and Fig. 15. Bootstrapping method as introduced in the main manuscript was used to calculate the empirical distributions, and McNemar's test as introduced in the main manuscript was used to analyze the differences between the CNNCF and the experts. The p-values of the McNemar's test (Supplementary Table 12,13,15 and 16) for the five evaluation indicators were all 1.0.

164

165

166

167

168

169

Supplementary Table 14: Performance indices of the classification framework (CNNCF) of the experiment O and the average performance of the 7th year respiratory resident (Respira.), the 3rd year emergency resident (Emerg.), the 1st year respiratory intern (Intern), the 5th year radiologist(Rad-5th) and the 3rd year radiologist(Rad-3rd).

|                    | X-data(*Normal and COVID-19 cases from RSNA, CCD and Youan Hospital) |                           |                           |                           |                           |                           |
|--------------------|----------------------------------------------------------------------|---------------------------|---------------------------|---------------------------|---------------------------|---------------------------|
|                    | CNNCF                                                                | Respire.                  | Emerg.                    | Intern.                   | Rad-5th                   | Rad-3rd                   |
| F1(95%CI)          | 0.9577<br>(0.9189,0.9857)                                            | 0.9600<br>(0.9206,0.9878) | 0.9221<br>(0.8740,0.9618) | 0.8250<br>(0.7612,0.8861) | 0.9726<br>(0.9427,0.9934) | 0.8408<br>(0.7702,0.9000) |
| Kappa(95%CI)       | 0.9407<br>(0.8851,0.9801)                                            | 0.9426<br>(0.8871,0.9817) | 0.8870<br>(0.8199,0.9434) | 0.7424<br>(0.6573,0.8302) | 0.9611<br>(0.9188,0.9905) | 0.7673<br>(0.6730,0.8513) |
| Specificity(95%CI) | 0.9886<br>(0.9714,1.0000)                                            | 0.9657<br>(0.9349,0.9884) | 0.9371<br>(0.9000,0.9718) | 0.8743<br>(0.8239,0.9226) | 0.9829<br>(0.9605,1.0000) | 0.8914<br>(0.8424,0.9368) |
| Sensitivity(95%CI) | 0.9444<br>(0.8857,0.9877)                                            | 1.0000<br>(1.0000,1.0000) | 0.9861<br>(0.9529,1.0000) | 0.9167<br>(0.8511,0.9726) | 0.9861<br>(0.9487,1.0000) | 0.9167<br>(0.8450,0.9769) |
| Precision(95%CI)   | 0.9714<br>(0.9259,1.0000)                                            | 0.9231<br>(0.8529,0.9759) | 0.8659<br>(0.7867,0.9342) | 0.7500<br>(0.6667,0.8427) | 0.9595<br>(0.9103,1.0000) | 0.7765<br>(0.6818,0.8605) |
|                    | X-data(Pneumonia and COVID-19 cases from RSNA and Youan Hospital)    |                           |                           |                           |                           |                           |
|                    | CNNCF                                                                | Respire.                  | Emerg.                    | Intern.                   | Rad-5th                   | Rad-3rd                   |
| F1(95%CI)          | 0.9636<br>(0.9368,0.9862)                                            | 0.9600<br>(0.9314,0.9831) | 0.9345<br>(0.8981,0.9655) | 0.8821<br>(0.8354,0.9223) | 0.9596<br>(0.9302,0.9846) | 0.8987<br>(0.8550,0.9372) |
| Kappa(95%CI)       | 0.9378<br>(0.8927,0.9766)                                            | 0.9305<br>(0.8831,0.9694) | 0.8915<br>(0.8252,0.9387) | 0.7926<br>(0.7140,0.8633) | 0.9303<br>(0.8828,0.9757) | 0.8229<br>(0.7500,0.8864) |
| Specificity(95%CI) | 0.9742<br>(0.9480,0.9940)                                            | 0.9548<br>(0.9195,0.9857) | 0.9290<br>(0.8854,0.9660) | 0.8839<br>(0.8333,0.9299) | 0.9613<br>(0.9308,0.9929) | 0.9032<br>(0.8581,0.9497) |
| Sensitivity(95%CI) | 0.9636<br>(0.9262,0.9913)                                            | 0.9818<br>(0.9524,1.0000) | 0.9640<br>(0.9259,0.9915) | 0.9182<br>(0.8627,0.9646) | 0.9727<br>(0.9380,1.0000) | 0.9273<br>(0.8738,0.9712) |
| Precision(95%CI)   | 0.9636<br>(0.9266,0.9917)                                            | 0.9391<br>(0.8916,0.9802) | 0.9068<br>(0.8509,0.9565) | 0.8487<br>(0.7788,0.9068) | 0.9469<br>(0.9038,0.9904) | 0.8718<br>(0.8087,0.9280) |

Supplementary Table 15: Results of McNemar’s Test for CNNCF and experts on distinct of COVID-19 and \*Normal cases by means of X-data collected from RSNA, CCD datasets and Youan Hospital

|             | CNNCF/Respira. |           | CNNCF/Emerg. |           | CNNCF/Intern. |           | CNNCF/Rad-5th. |           | CNNCF/Rad-3rd. |           |
|-------------|----------------|-----------|--------------|-----------|---------------|-----------|----------------|-----------|----------------|-----------|
|             | p-value        | statistic | p-value      | statistic | p-value       | statistic | p-value        | statistic | p-value        | statistic |
| F1          | 1.0000         | 0.9375    | 1.0000       | 0.9156    | 1.0000        | 0.9770    | 1.0000         | 0.9231    | 1.0000         | 0.9481    |
| Kappa       | 1.0000         | 0.9259    | 1.0000       | 0.8901    | 1.0000        | 0.9302    | 1.0000         | 0.9231    | 1.0000         | 0.8621    |
| Specificity | 1.0000         | 0.7943    | 1.0000       | 0.7152    | 1.0000        | 0.8617    | 1.0000         | 0.9231    | 1.0000         | 0.6829    |
| Sensitivity | 1.0000         | 0.9375    | 1.0000       | 0.9148    | 1.0000        | 0.9708    | 1.0000         | 0.9231    | 1.0000         | 0.9351    |
| Precision   | 1.0000         | 0.8800    | 1.0000       | 0.8282    | 1.0000        | 0.9157    | 1.0000         | 0.9231    | 1.0000         | 0.8148    |

Supplementary Table 16: Results of McNemar’s Test for CNNCF and experts on distinct of COVID-19 and Pneumonia cases by means of X-data collected from RSNA dataset and Youan Hospital)

|             | CNNCF/Respira. |           | CNNCF/Emerg. |           | CNNCF/Intern. |           | CNNCF/Rad-5th. |           | CNNCF/Rad-3rd. |           |
|-------------|----------------|-----------|--------------|-----------|---------------|-----------|----------------|-----------|----------------|-----------|
|             | p-value        | statistic | p-value      | statistic | p-value       | statistic | p-value        | statistic | p-value        | statistic |
| F1          | 1.0000         | 0.9498    | 1.0000       | 0.9144    | 1.0000        | 0.9494    | 1.0000         | 0.9720    | 1.0000         | 0.9286    |
| Kappa       | 1.0000         | 0.9333    | 1.0000       | 0.8843    | 1.0000        | 0.9236    | 1.0000         | 0.9722    | 1.0000         | 0.8974    |
| Specificity | 1.0000         | 0.8559    | 1.0000       | 0.7408    | 1.0000        | 0.8497    | 1.0000         | 0.9018    | 1.0000         | 0.8145    |
| Sensitivity | 1.0000         | 0.9440    | 1.0000       | 0.8940    | 1.0000        | 0.9366    | 1.0000         | 0.9593    | 1.0000         | 0.9291    |
| Precision   | 1.0000         | 0.9151    | 1.0000       | 0.8585    | 1.0000        | 0.9375    | 1.0000         | 0.9238    | 1.0000         | 0.9065    |

Supplementary Table 17: Performance indices of the classification framework (CNNCF) of the experiment P and the average performance of the 7th year respiratory resident (Respira.), the 3rd year emergency resident (Emerg.), the 1st year respiratory intern (Intern), the 5th year radiologist(Rad-5th) and the 3rd year radiologist(Rad-3rd).

|                    | CT-data(*Normal and COVID-19 cases from LUNA and Youan Hospital)   |                           |                           |                           |                           |                           |
|--------------------|--------------------------------------------------------------------|---------------------------|---------------------------|---------------------------|---------------------------|---------------------------|
|                    | CNNCF                                                              | Respire.                  | Emerg.                    | Intern.                   | Rad-5th                   | Rad-3rd                   |
| F1(95%CI)          | 1.0000<br>(1.0000,1.0000)                                          | 1.0000<br>(1.0000,1.0000) | 1.0000<br>(1.0000,1.0000) | 0.9048<br>(0.8000,0.9796) | 1.0000<br>(1.0000,1.0000) | 0.9500<br>(0.8649,1.0000) |
| Kappa(95%CI)       | 1.0000<br>(1.0000,1.0000)                                          | 1.0000<br>(1.0000,1.0000) | 1.0000<br>(1.0000,1.0000) | 0.8537<br>(0.7015,0.9655) | 1.0000<br>(1.0000,1.0000) | 0.9250<br>(0.8052,1.0000) |
| Specificity(95%CI) | 1.0000<br>(1.0000,1.0000)                                          | 1.0000<br>(1.0000,1.0000) | 1.0000<br>(1.0000,1.0000) | 0.9250<br>(0.8333,1.0000) | 1.0000<br>(1.0000,1.0000) | 0.9750<br>(0.9117,1.0000) |
| Sensitivity(95%CI) | 1.0000<br>(1.0000,1.0000)                                          | 1.0000<br>(1.0000,1.0000) | 1.0000<br>(1.0000,1.0000) | 0.9500<br>(0.8180,1.0000) | 1.0000<br>(1.0000,1.0000) | 0.9500<br>(0.8462,1.0000) |
| Precision(95%CI)   | 1.0000<br>(1.0000,1.0000)                                          | 1.0000<br>(1.0000,1.0000) | 1.0000<br>(1.0000,1.0000) | 0.8636<br>(0.7058,1.0000) | 1.0000<br>(1.0000,1.0000) | 0.9500<br>(0.8333,1.0000) |
|                    | CT-data(Pneumonia and COVID-19 cases from ICNP and Youan Hospital) |                           |                           |                           |                           |                           |
|                    | CNNCF                                                              | Respire.                  | Emerg.                    | Intern.                   | Rad-5th                   | Rad-3rd                   |
| F1(95%CI)          | 0.9756<br>(0.9129,1.0000)                                          | 1.0000<br>(1.0000,1.0000) | 0.9048<br>(0.7856,0.9787) | 0.8000<br>(0.6471,0.9091) | 0.9744<br>(0.9143,1.0000) | 0.7391<br>(0.5599,0.8627) |
| Kappa(95%CI)       | 0.9664<br>(0.8837,1.0000)                                          | 1.0000<br>(1.0000,1.0000) | 0.8678<br>(0.7079,0.9690) | 0.7158<br>(0.5356,0.8683) | 0.9654<br>(0.8837,1.0000) | 0.8229<br>(0.4069,0.7931) |
| Specificity(95%CI) | 0.9818<br>(0.9375,1.0000)                                          | 1.0000<br>(1.0000,1.0000) | 0.9455<br>(0.8793,1.0000) | 0.8727<br>(0.7826,0.9584) | 1.0000<br>(1.0000,1.0000) | 0.8364<br>(0.7414,0.9259) |
| Sensitivity(95%CI) | 1.0000<br>(1.0000,1.0000)                                          | 1.0000<br>(1.0000,1.0000) | 0.9500<br>(0.8260,1.0000) | 0.9000<br>(0.7500,1.0000) | 0.9500<br>(0.8421,1.0000) | 0.8500<br>(0.6667,1.0000) |
| Precision(95%CI)   | 0.9524<br>(0.8398,1.0000)                                          | 1.0000<br>(1.0000,1.0000) | 0.8636<br>(0.6923,1.0000) | 0.7200<br>(0.5263,0.8966) | 1.0000<br>(1.0000,1.0000) | 0.6538<br>(0.4583,0.8422) |

Supplementary Table 18: Results of McNemar’s Test for CNNCF and experts on distinct of COVID-19 and \*Normal cases by means of CT-data collected from LUNA dataset and Youan Hospital

|             | CNNCF/Respira. |           | CNNCF/Emerg. |           | CNNCF/Intern. |           | CNNCF/Rad-5th. |           | CNNCF/Rad-3rd. |           |
|-------------|----------------|-----------|--------------|-----------|---------------|-----------|----------------|-----------|----------------|-----------|
|             | p-value        | statistic | p-value      | statistic | p-value       | statistic | p-value        | statistic | p-value        | statistic |
| F1          | 1.0000         | 0.9000    | 1.0000       | 0.8502    | 1.0000        | 0.9268    | 1.0000         | 0.9474    | 1.0000         | 0.8571    |
| Kappa       | 1.0000         | 0.9000    | 1.0000       | 0.8502    | 1.0000        | 0.9268    | 1.0000         | 0.9473    | 1.0000         | 0.8571    |
| Specificity | 1.0000         | 0.9000    | 1.0000       | 0.8502    | 1.0000        | 0.9268    | 1.0000         | 0.9048    | 1.0000         | 0.8571    |
| Sensitivity | 1.0000         | 0.9000    | 1.0000       | 0.8502    | 1.0000        | 0.9268    | 1.0000         | 0.9474    | 1.0000         | 0.8571    |
| Precision   | 1.0000         | 0.7857    | 1.0000       | 0.7222    | 1.0000        | 0.8958    | 1.0000         | 0.9167    | 1.0000         | 0.6875    |

Supplementary Table 19: Results of McNemar’s Test for CNNCF and experts on distinct of COVID-19 and Pneumonia cases by means of CT-data collected from ICNP dataset and Youan Hospital)

|             | CNNCF/Respira. |           | CNNCF/Emerg. |           | CNNCF/Intern. |           | CNNCF/Rad-5th. |           | CNNCF/Rad-3rd. |           |
|-------------|----------------|-----------|--------------|-----------|---------------|-----------|----------------|-----------|----------------|-----------|
|             | p-value        | statistic | p-value      | statistic | p-value       | statistic | p-value        | statistic | p-value        | statistic |
| F1          | 1.0000         | 1.0000    | 1.0000       | 1.0000    | 1.0000        | 1.0000    | 1.0000         | 1.0000    | 1.0000         | 1.0000    |
| Kappa       | 1.0000         | 1.0000    | 1.0000       | 1.0000    | 1.0000        | 1.0000    | 1.0000         | 1.0000    | 1.0000         | 1.0000    |
| Specificity | 1.0000         | 0.8484    | 1.0000       | 0.7911    | 1.0000        | 0.9318    | 1.0000         | 0.8750    | 1.0000         | 0.8235    |
| Sensitivity | 1.0000         | 1.0000    | 1.0000       | 1.0000    | 1.0000        | 1.0000    | 1.0000         | 1.0000    | 1.0000         | 1.0000    |
| Precision   | 1.0000         | 0.9730    | 1.0000       | 0.9609    | 1.0000        | 1.0000    | 1.0000         | 0.9474    | 1.0000         | 1.0000    |



**a** X-RAY-NC

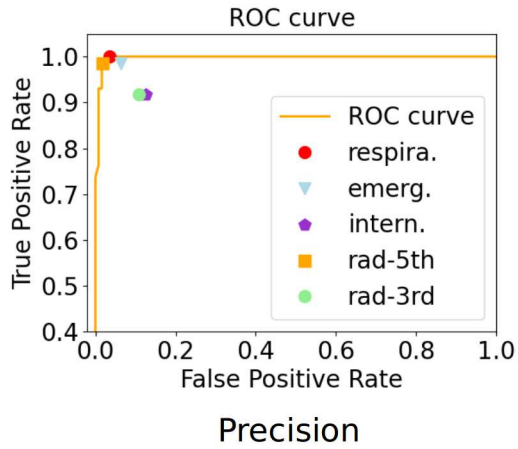

**b** X-RAY-PC

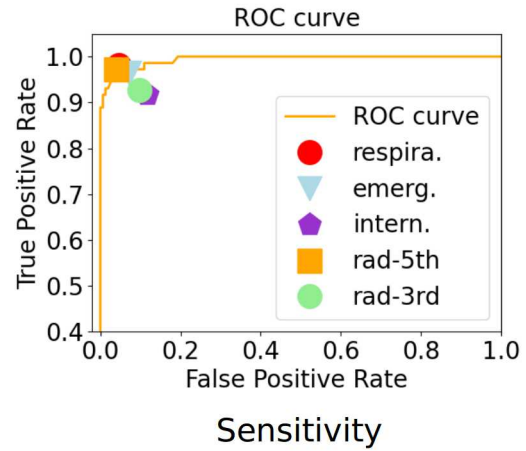

**c** X-RAY-NC

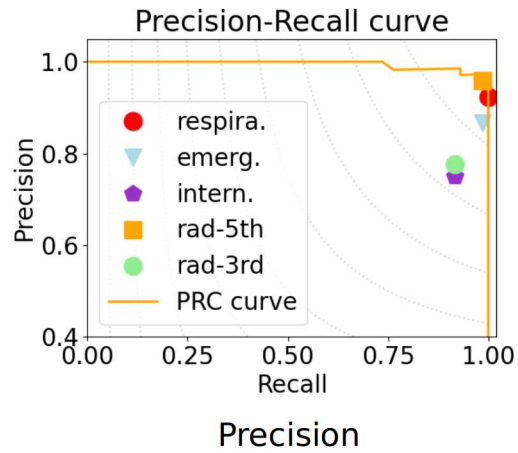

**d** X-RAY-PC

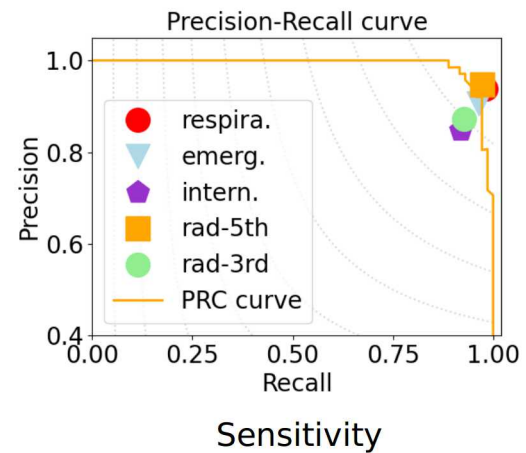

Supplementary Figure 12: ROC and PRC curves for the CNNCF and expert results for COVID-19 identification using XMVS. NC indicates that the positive case is a COVID-19 case, and the negative case is \*Normal. PC indicates that the positive case is COVID-19, and the negative case is pneumonia. \*Normal cases, pneumonia cases and COVID-19 cases used for evaluation were collected from both public data and Youan hospital data.

**a CT-NC**

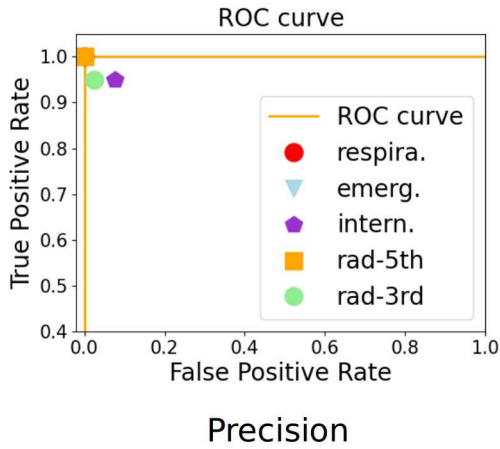

**b CT-PC**

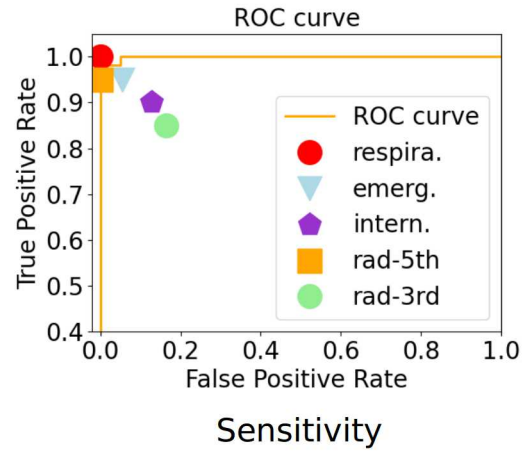

**c CT-NC**

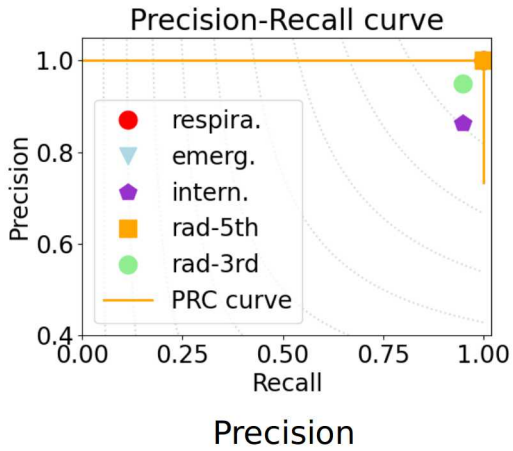

**d CT-PC**

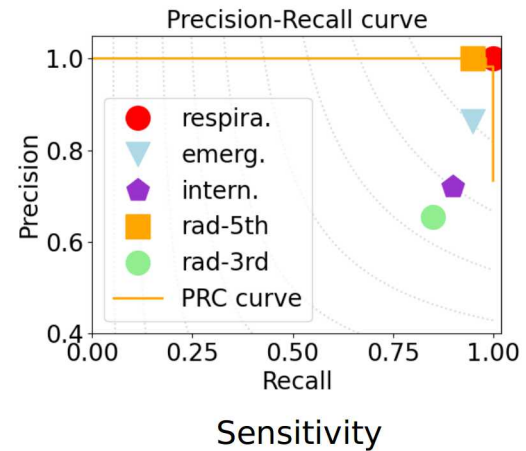

Supplementary Figure 13: ROC and PRC curves for the CNNCF and expert results for COVID-19 identification using CTMVS. NC indicates that the positive case is a COVID-19 case, and the negative case is \*Normal. PC indicates that the positive case is COVID-19, and the negative case is pneumonia. \*Normal cases and pneumonia cases used for evaluation were collected from both public data and Youan hospital data.

**a** X-Ray-NC

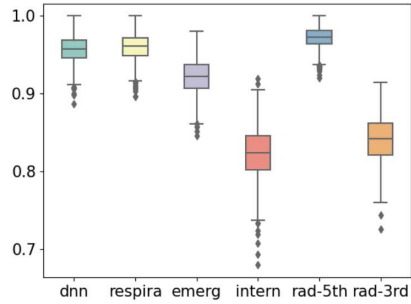

F1 score

**b** X-Ray-NC

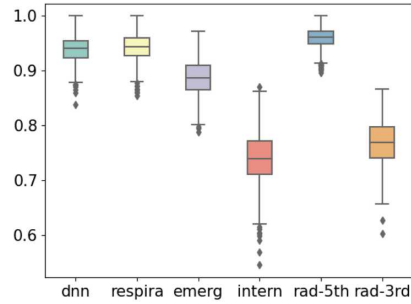

Kappa score

**c** X-Ray-NC

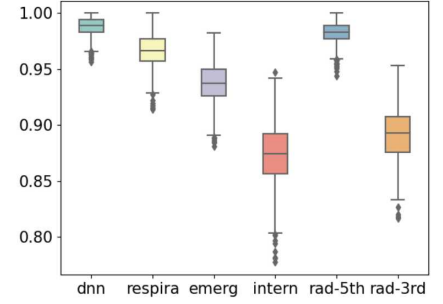

Specificity

**d** X-Ray-PC

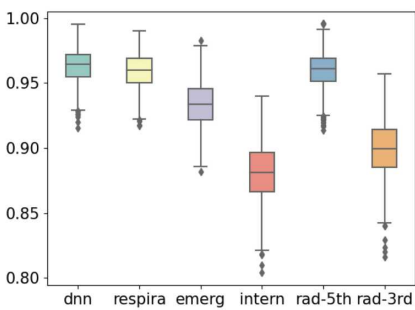

F1 score

**e** X-Ray-PC

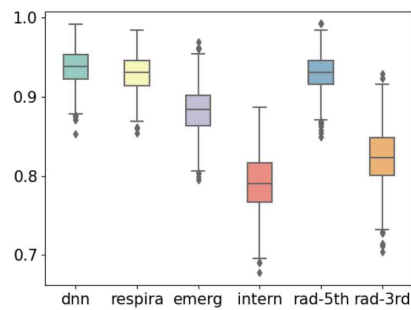

Kappa score

**f** X-Ray-PC

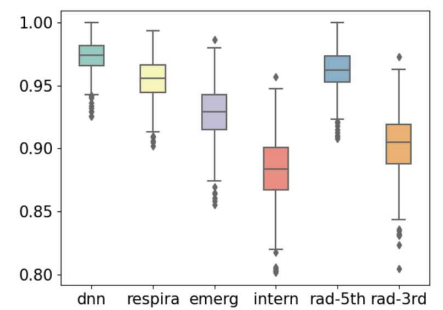

Specificity

Supplementary Figure 14: Boxplots of F1 score, Kappa score and specificity for the CNNCF and expert results for COVID-19 identification on XMVS. NC indicates that the positive case is a COVID-19 case, and the negative case is \*Normal. PC indicates that the positive case is COVID-19, and the negative case is Pneumonia. Bootstrapping is used to generate 1000 resampled validation sets for both XMVS and CTMVS.

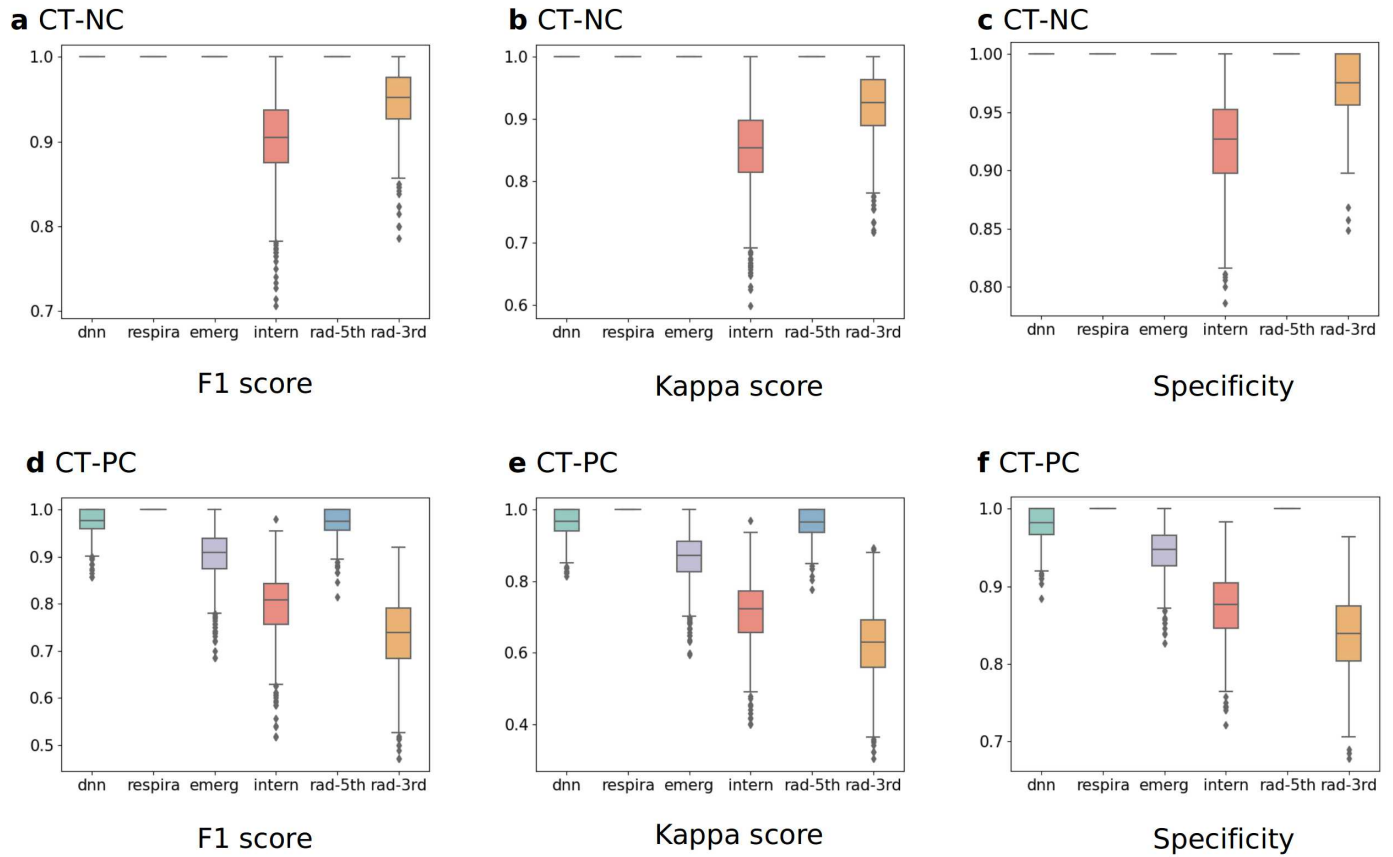

Supplementary Figure 15: Boxplots of F1 score, Kappa score and specificity for the CNNCF and expert results for COVID-19 identification on CTMVS. NC indicates that the positive case is a COVID-19 case, and the negative case is \*Normal. PC indicates that the positive case is COVID-19, and the negative case is Pneumonia. Bootstrapping is used to generate 1000 resampled validation sets for both XMVS and CTMVS.

**a** X-Ray-NC

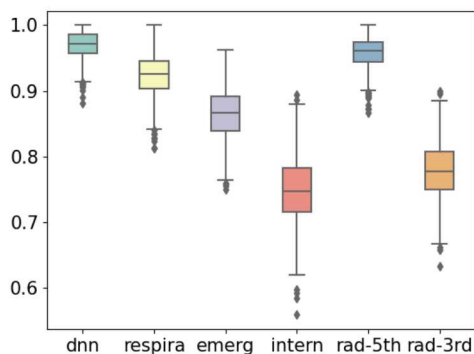

Precision

**b** X-Ray-NC

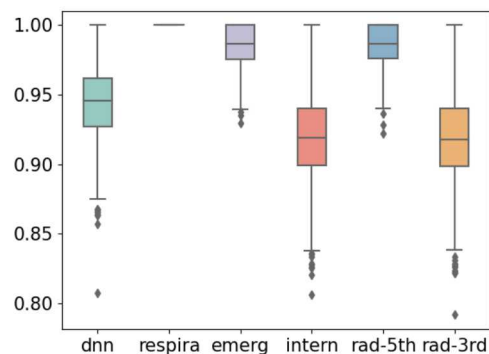

Sensitivity

**c** X-Ray-PC

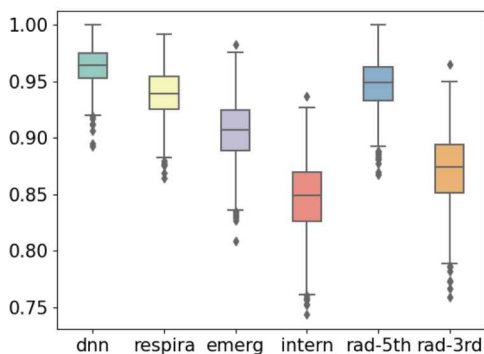

Precision

**d** X-Ray-PC

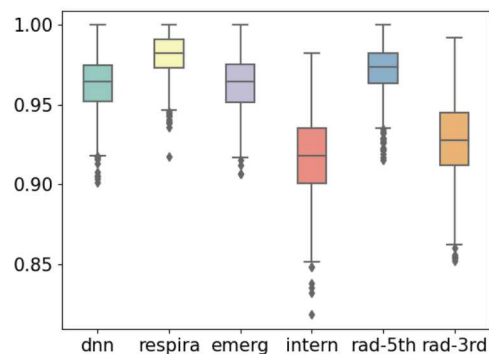

Sensitivity

Supplementary Figure 16: Boxplots of precision and sensitivity for the CNNCF and expert results for COVID-19 identification on XMVS. NC indicates that the positive case is a COVID-19 case, and the negative case is \*Normal. PC indicates that the positive case is COVID-19, and the negative case is Pneumonia. Bootstrapping is used to generate 1000 resampled validation sets for both XMVS and CTMVS.

**a CT-NC**

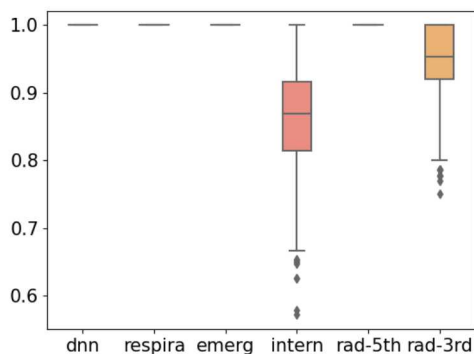

Precision

**b CT-NC**

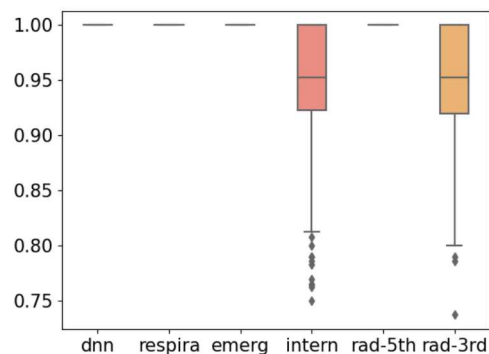

Sensitivity

**c CT-PC**

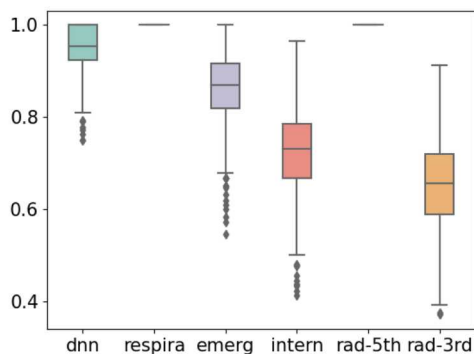

Precision

**d CT-PC**

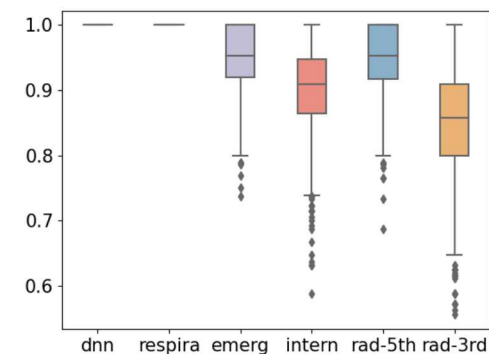

Sensitivity

Supplementary Figure 17: Boxplots of precision and sensitivity for the CNNCF and expert results for COVID-19 identification on CTMVS. NC indicates that the positive case is a COVID-19 case, and the negative case is \*Normal. PC indicates that the positive case is COVID-19, and the negative case is Pneumonia. Bootstrapping is used to generate 1000 resampled validation sets for both XMVS and CTMVS.

170 n. Experiment-R. In order to obtain a more comprehensive evaluation of the CNNCF while further improv-  
 171 ing the usability in clinical practice, the CNNCF was used to distinguish the COVID-19, pneumonia and  
 172 \*Normal cases simultaneously. The ROC scores for distinguishing COVID-19 from \*Normal and pneu-  
 173 monia cases using XMVS are plotted in Supplementary Fig. 16-a; the AUROC of the CNNCF is 0.9714.  
 174 The precision-recall scores for distinguishing COVID-19 from \*Normal and pneumonia cases using X-data  
 175 are shown in Supplementary Fig. 16-c; the AUPRC of the CNNCF is 0.9551. The ROC scores for dis-  
 176 tinguishing COVID-19 from \*Normal and pneumonia cases using CTMVS are plotted in Supplementary  
 177 Fig. 16-b; the AUROC of the CNNCF is 1.0. The precision-recall scores for distinguishing COVID-19  
 178 from \*Normal and pneumonia cases are shown in Supplementary Fig. 16-d; the AUPRC of the CNNCF  
 179 is 1.0.

**a X-RAY-NPC**

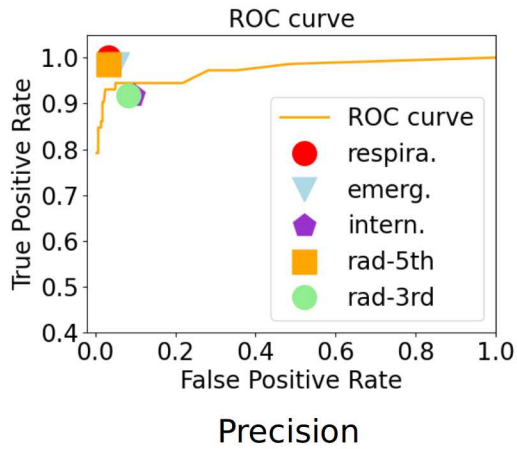

**b CT-NPC**

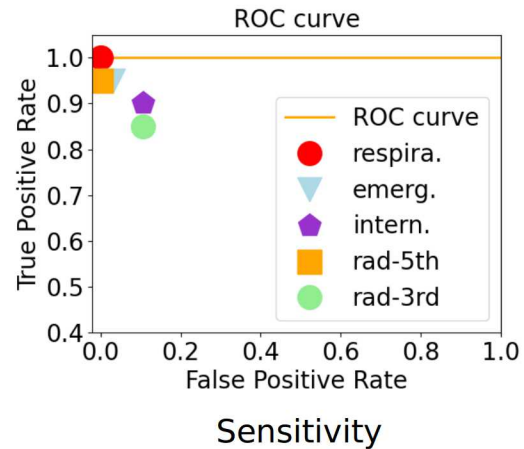

**c X-RAY-NPC**

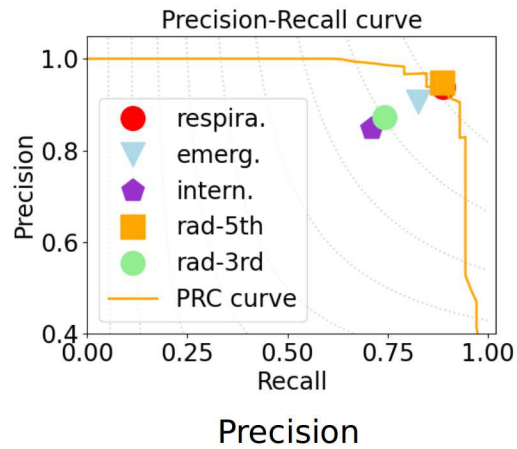

**d CT-NPC**

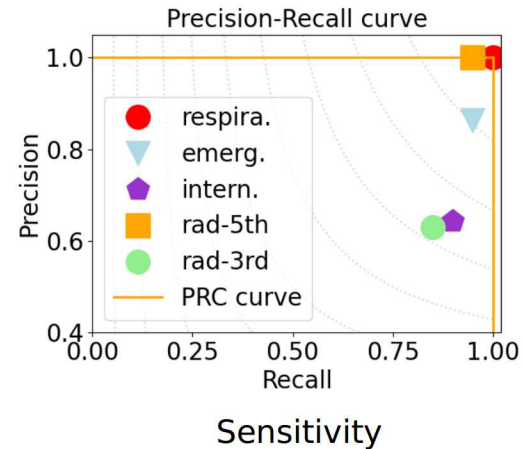

Supplementary Figure 18: ROC and PRC curves for the CNNCF and expert results for COVID-19 identification using XMVS and CTMVS. NPC indicates that the positive case is a COVID-19 case, and the negative case is \*Normal and pneumonia. \*Normal cases, pneumonia cases and COVID-19 cases used for evaluation were collected from both public data and Youan hospital data.

Supplementary Table 20: Five clinical indicators of COVID-19

| Clinical indicators           | COVID-19(n=95)     |
|-------------------------------|--------------------|
| White blood cell ( $10^9/L$ ) | 4.26[3.50,5.82]    |
| Neutrophil (%)                | 63.50[51.50,72.00] |
| Lymphocyte (%)                | 26.10[18.80,34.55] |
| Procalcitonin (mg/L)          | 0.12[0.10,0.15]    |
| C-reactive protein (mg/L)     | 16.30[3.79,39.95]  |



## Supplementary Methods

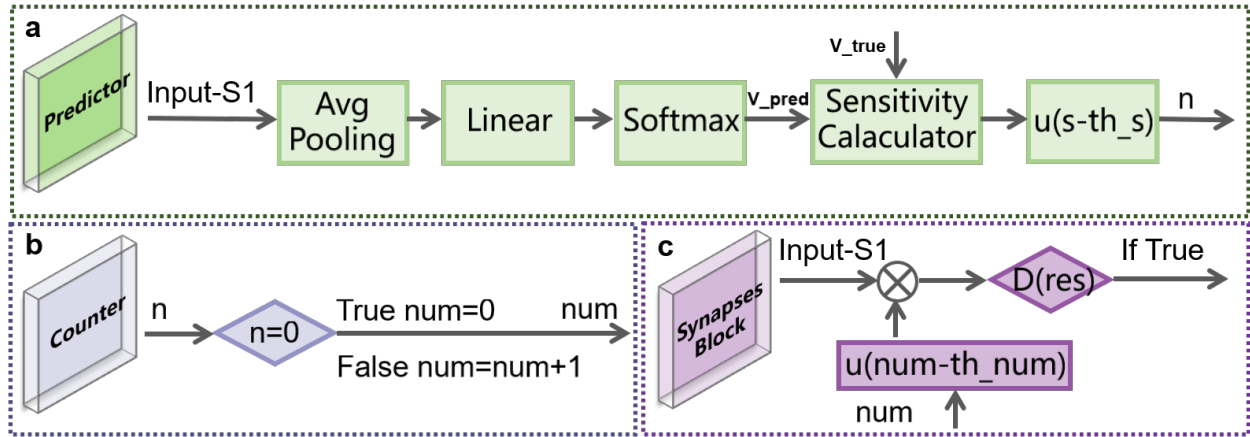

Supplementary Figure 19: Details of control Gate Block.

Supplementary Table 21: Hyper parameters of four teacher networks(TS)

|     | RT-PCR testing |            |                    |            |            |
|-----|----------------|------------|--------------------|------------|------------|
|     | ResBlock-A     | ResBlock-B | Control Gate Block | ResBlock-A | ResBlock-B |
| TS1 | 2              | 1          | 1                  | 3          | 1          |
| TS2 | 2              | 2          | 1                  | 2          | 1          |
| TS3 | 3              | 1          | 1                  | 2          | 1          |
| TS4 | 3              | 2          | 1                  | 2          | 1          |

Supplementary Table 22: Comparison of RT-PCR test results using throat specimen and the CNNCF results using CT data for COVID-19 and \*Normal cases

|                    | CNNCF                  | RT-PCR                 |
|--------------------|------------------------|------------------------|
| F1(95%CI)          | 1.0000 (1.0000,1.0000) | 0.9502 (0.9068,0.9790) |
| Kappa(95%CI)       | 1.0000 (1.0000,1.0000) | 0.9229 (0.8574,0.9664) |
| Specificity(95%CI) | 1.0000 (1.0000,1.0000) | 1.0000 (1.0000,1.0000) |
| Sensitivity(95%CI) | 1.0000 (1.0000,1.0000) | 0.8947 (0.8295,0.9588) |
| Precision(95%CI)   | 1.0000 (1.0000,1.0000) | 1.0000 (1.0000,1.0000) |

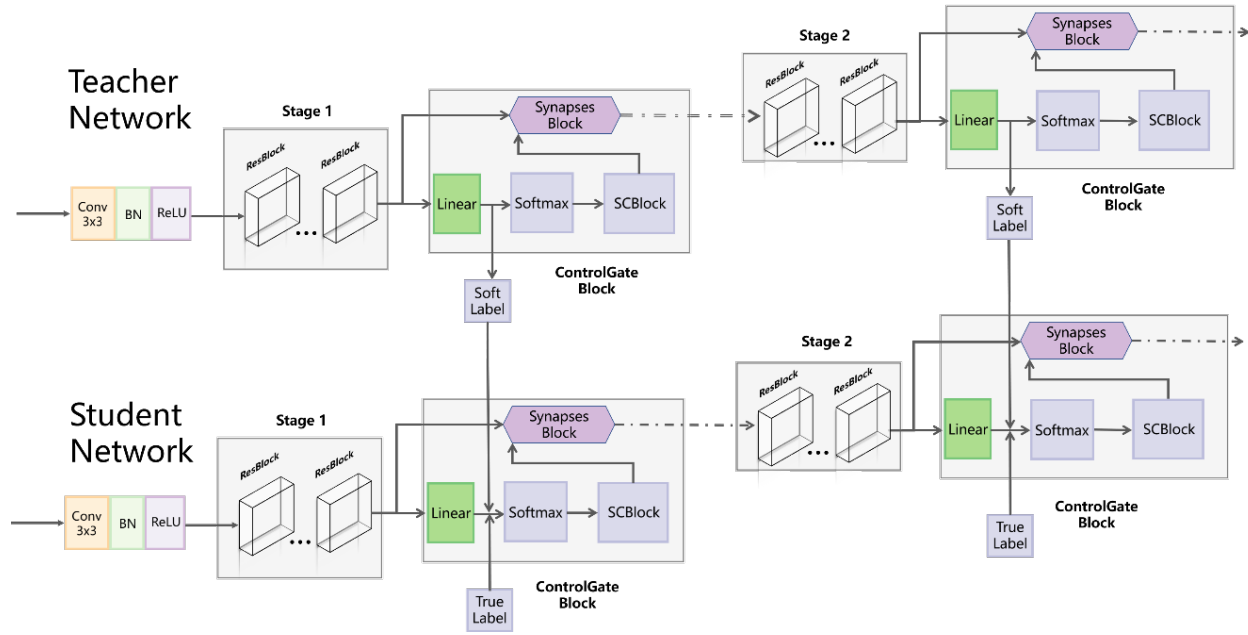

Supplementary Figure 20: Details of knowledge distilling method.

|                     |                              | True condition                                                                                                                               |                                                                                                                                       |                                                                                                                           |                                                                                                                |                                                                                                               |
|---------------------|------------------------------|----------------------------------------------------------------------------------------------------------------------------------------------|---------------------------------------------------------------------------------------------------------------------------------------|---------------------------------------------------------------------------------------------------------------------------|----------------------------------------------------------------------------------------------------------------|---------------------------------------------------------------------------------------------------------------|
|                     |                              | Total population                                                                                                                             | Condition positive                                                                                                                    | Condition negative                                                                                                        |                                                                                                                |                                                                                                               |
| Predicted condition | Predicted condition positive | <b>True positive, Power</b>                                                                                                                  | <b>False positive, Type I error</b>                                                                                                   | Positive predictive value (PPV), Precision = $\frac{\sum \text{True positive}}{\sum \text{Predicted condition positive}}$ | False discovery rate (FDR) = $\frac{\sum \text{False positive}}{\sum \text{Predicted condition positive}}$     |                                                                                                               |
|                     | Predicted condition negative | <b>False negative, Type II error</b>                                                                                                         | <b>True negative</b>                                                                                                                  | False omission rate (FOR) = $\frac{\sum \text{False negative}}{\sum \text{Predicted condition negative}}$                 | Negative predictive value (NPV) = $\frac{\sum \text{True negative}}{\sum \text{Predicted condition negative}}$ |                                                                                                               |
|                     |                              | True positive rate (TPR), Recall, Sensitivity, probability of detection = $\frac{\sum \text{True positive}}{\sum \text{Condition positive}}$ | False positive rate (FPR), Fall-out, probability of false alarm = $\frac{\sum \text{False positive}}{\sum \text{Condition negative}}$ | Positive likelihood ratio (LR+) = $\frac{\text{TPR}}{\text{FPR}}$                                                         | Diagnostic odds ratio (DOR) = $\frac{\text{LR+}}{\text{LR-}}$                                                  | F1 score = $\frac{2}{\frac{1}{\text{Recall}} + \frac{1}{\text{Precision}}}$                                   |
|                     |                              | False negative rate (FNR), Miss rate = $\frac{\sum \text{False negative}}{\sum \text{Condition positive}}$                                   | True negative rate (TNR), Specificity (SPC) = $\frac{\sum \text{True negative}}{\sum \text{Condition negative}}$                      | Negative likelihood ratio (LR-) = $\frac{\text{FNR}}{\text{TNR}}$                                                         |                                                                                                                | Accuracy (ACC) = $\frac{\sum \text{True positive} + \sum \text{True negative}}{\sum \text{Total population}}$ |

Supplementary Figure 21: The equations of the statistical indices.

## Supplementary Abbreviations

Supplementary Table 23: Abbreviations

| Abbreviations   | Words and Phrases                                            | Abbreviations             | Words and Phrases                                           |
|-----------------|--------------------------------------------------------------|---------------------------|-------------------------------------------------------------|
| COVID-19        | Coronavirus Disease 2019                                     | CT                        | Computed Tomography                                         |
| CNN             | Convolutional Neural Network                                 | WHO                       | World Health Organization                                   |
| rRT-PCR         | real-time Reverse Transcriptase Polymerase Chain Reaction    | SOPs                      | Standard Operating Procedures                               |
| BSL-3           | BioSafety Level 3                                            | RNA                       | RiboNucleic Acid                                            |
| ILI             | Influenza-Like Illness                                       | SARI                      | Severe Acute Respiratory Infection                          |
| CXR             | Chest RadiogRaphy                                            | DL                        | Deep Learning                                               |
| SIFT            | Scale-Invariant Feature Transform                            | RANSAC                    | Random Sample Consensus                                     |
| PCA             | Principal Component Analysis                                 | Grad-CAM                  | Gradient-weighted Class Activation Mapping                  |
| TTSF            | Train-Test-Split Function                                    | DICOM                     | Digital Imaging and Communications in Medicine              |
| OpenCV          | Open Source Computer Vision Library                          | CNNCF                     | Convolutional Neural Network based Classification Framework |
| CNNRF           | Convolutional Neural Network based Regression Framework      | XPDS                      | X-ray Public DataSet                                        |
| XPTS            | X-ray Public Training Set                                    | XPVS                      | X-ray Public Test Set                                       |
| XHDS            | X-ray Hospital DataSet                                       | XHTS                      | X-ray Hospital Training Set                                 |
| XHVS            | X-ray Hospital Test Set                                      | CTPDS                     | CT Public DataSet                                           |
| CTPTS           | CT Public Training Set                                       | CTPVS                     | CT Public Test Set                                          |
| CTHDS           | CT Hospital DataSet                                          | CTHTS                     | CT Hospital Training Set                                    |
| CTHVS           | CT Hospital Test Set                                         | CADS                      | Correlation Analysis DataSet                                |
| CATS            | Correlation Analysis Training Set                            | CAVS                      | Correlation Analysis Test Set                               |
| SAs             | Suspected Areas with inflammatory lesions                    | XMTS                      | X-ray Mixed Training Set                                    |
| XMVS            | X-ray Mixed Test Set                                         | CTMTS                     | CT Mixed Training Set                                       |
| CTMVS           | CT Mixed Test Set                                            | CCD                       | COVID CXR Dataset                                           |
| ROC             | Receiver Operating Characteristic                            | AUROC                     | the Area Under the ROC curve                                |
| AUPRC           | the Area Under the Precision-Recall Curve                    | DBSCAN                    | Density-Based Spatial Clustering of Applications with Noise |
| CPC             | Center Pixel Coordinates                                     | ST                        | Significance Test                                           |
| MSE             | Mean Square Error                                            | MAE                       | Mean Absolute Error                                         |
| RMSE            | Root Mean Square Error                                       | r                         | correlation coefficient                                     |
| $R^2$           | coefficient of determination                                 | PCC                       | Pearson Correlation Coefficient                             |
| SGD             | Stochastic Gradient Descent                                  | JPG                       | Joint Photographic Experts Group                            |
| PNG             | Portable Network Graphics                                    | TIFF                      | Tag Image File Format                                       |
| TPR             | True Positive Rate                                           | FPR                       | False Positive Rate                                         |
| TP              | True Positive                                                | TN                        | True Negative                                               |
| FN              | False Negative                                               | PPV                       | Positive Predictive Value                                   |
| XNPDS           | X-data of the *Normal cases in XPDS                          | XPPDS                     | X-data of the Pneumonia cases in XPDS                       |
| XCPDS           | X-data of the COVID-19 cases in XPDS                         | XNHDS                     | X-data of the *Normal cases in XPHS                         |
| XPPDS           | X-data of the Pneumonia cases in XPHS                        | XCPDS                     | X-data of the COVID-19 cases in XPHS                        |
| CTNPDS          | CT-data of the *Normal cases in CTPDS                        | CTPPDS                    | CT-data of the Pneumonia cases in CTPDS                     |
| CTCPDS          | CT-data of the COVID-19 cases in CTPDS                       | CTNHDS                    | CT-data of the *Normal cases in CTPHS                       |
| CTPPDS          | CT-data of the Pneumonia cases in CTPHS                      | CTCPDS                    | CT-data of the COVID-19 cases in CTPHS                      |
| SQL             | Structured Query Language                                    | CSV                       | Comma-Separated Values                                      |
| JSON            | JavaScript object notation                                   | Max-Pooling               | Max-Pooling Layer                                           |
| BN              | batch norm layer                                             | SRT                       | Standardized Residency Training                             |
| Kappa           | Kappa score                                                  | Sen                       | Sensitivity                                                 |
| Spe             | Specificity                                                  | Pr                        | Precision                                                   |
| Normal cases    | cases where the lungs are not manifest evidence of COVID-19, | pneumonia or influenza on | imaging and the RT-PCR testing of the COVID-19 is negative. |
| COVID-19 cases  | cases where the lungs are manifest evidence of COVID-19 on   | imaging and the RT-PCR    | testing of the COVID-19 is positive.                        |
| Influenza cases | cases where the lungs are manifest evidence of Influenza on  | imaging and the RT-PCR    | testing of the COVID-19 is negative.                        |
| Pneumonia cases | cases where the lungs are manifest evidence of Pneumonia on  | imaging and the RT-PCR    | testing of the COVID-19 is negative.                        |

182 **Supplementary References**

- 183 [1] Zhu, J., Li, W. & Chen, L. Doctors in china: improving quality through modernisation of residency  
184 education. *The Lancet* **388**, 1922–1929 (2016).
- 185 [2] Huang, S.-L., Chen, Q. & Liu, Y. Medical resident training in china. *International Journal of Medical*  
186 *Education* **9**, 108 (2018).
- 187 [3] Zeng, M. S. *et al.* Current status of radiology in china. *World journal of gastroenterology* **6**, 193 (2000).
